# Supplementary material for: Patterns of antibiotic cross-resistance by bacterial sample source: a retrospective cohort study
Source: bioRxiv or medRxiv preprint supplement (doi:10.1101/2022.03.31.22273223), 2022-06-24
Supplement: Supplementary file [file media-1.pdf]

## Supplementary Methods

While no assumptions of causal relationships are required, we restricted the model space to disallow causal paths that made no sense for our study: (1) *sex* could only cause other variables and not be caused by any other variable, (2) *age* at testing could be caused by *sex* but no other variable, (3) the seven variables for antibiotics given in the previous year could only be caused by *age* and *sex* and no other variable, (4) *days hospitalized* the prior year could not be caused by presence of nosocomial infection but could be caused by any other variable, (5) *nosocomial* infection could not be caused by resistance to any drug but can be caused by any other variable; (6) *polymicrobial* cultures as well as all drug antibiotic resistance tests could be caused by any of the variables; (7) the six medical conditions can be caused by *age* and *sex*; (7) *immunosuppression* and *CRF* can be caused by any of the other medical conditions; (8) high *BMI* can only be caused by one of the other medical conditions, *dementia*; (9) *dementia*, *diabetes*, and *COPD* can be caused by each other or high *BMI* but not *immunosuppression* and *CFR*; and (10) high *BMI* can only be caused by *dementia* but not the other 4 medical conditions. In addition, no causal paths were forced to be in the model.

## Supplementary Results

**Table S1: Antibiotic resistance tests excluded from analysis due to redundancies or missing data, along with their tetrachoric correlations with highly-correlated included variables**

| Dataset              | Antibiotic removed | Antibiotics it is correlated with | Tetrachoric correlation range |
|----------------------|--------------------|-----------------------------------|-------------------------------|
| <i>E.coli</i>        | AMP                | CAZ, CRO, CXM, LEX                | 0.80 - 0.93                   |
| <i>E.coli</i>        | CRO                | CAZ                               | 1.00                          |
| <i>E.coli</i>        | CXM                | CAZ                               | 0.99 - 1.00                   |
| <i>E.coli</i>        | LEX                | CAZ                               | 0.98 - 0.99                   |
| <i>K. pneumoniae</i> | AMC                | CAZ, CIP, CRO, CXM, GEN, LEX, TZP | 0.70 - 0.99                   |
| <i>K. pneumoniae</i> | CIP                | OFX                               | 0.89 - 1.00                   |
| <i>K. pneumoniae</i> | CRO                | CAZ                               | 0.98 - 1.00                   |
| <i>K. pneumoniae</i> | CXM                | CAZ                               | 0.99 - 1.00                   |
| <i>K. pneumoniae</i> | LEX                | CAZ                               | 0.98 - 0.99                   |
| <i>P. aeruginosa</i> | CIP                | GEN                               | 0.88 - 0.98                   |
| <i>P. aeruginosa</i> | PIP                | CAZ, TZP                          | 0.90 - 0.99                   |
| <i>P. aeruginosa</i> | IPM                | MEM                               | 0.94 - 0.99                   |
| <i>P. mirabilis</i>  | AMP                | CRO, CXM, GEN                     | 0.87 - 1.00                   |

|                     |     |          |             |
|---------------------|-----|----------|-------------|
| <i>P. mirabilis</i> | CAZ | CRO, CXM | 0.97 - 1.00 |
| <i>P. mirabilis</i> | CIP | OFX      | 0.97 - 1.00 |
| <i>P. mirabilis</i> | LEX | CRO, CXM | 0.97 - 1.00 |
| <i>S. aureus</i>    | CIP | OXA      | 0.86 - 0.96 |
| <i>S. aureus</i>    | ERY | CLI      | 0.98 - 0.99 |

Note: AMC, amoxicillin/clavulanate; AMP, ampicillin; CAZ, ceftazidime; CIP, ciprofloxacin; CLI, clindamycin; CRO, ceftriaxone; CXM, cefuroxime; ERY, erythromycin; Fusid, fusidic acid; GEN, gentamicin; IPM, imipenem; LEX, cefalexin; MEM, meropenem; MUP, mupirocin; OFX, ofloxacin; OXA, oxacillin; PIP, piperacillin; SXT, sulfamethoxazole/trimethoprim, TZP, piperacillin/tazobactam.

**Table S2: The maximum number of parents sufficient to reach the maximum likelihood, the number of arcs in this model, and the number of arcs present in at least 50% of the simulations, representing the final models presented, for each of the 5 bacteria analyzed.**

| Bacteria            | Site          | Max parents needed | Initial # of arcs | Arcs in 50% of simulations |
|---------------------|---------------|--------------------|-------------------|----------------------------|
| <i>E coli</i>       | Urine         | 7                  | 42                | 39                         |
|                     | Wound         | 5                  | 26                | 26                         |
|                     | Aerobic blood | 6                  | 19                | 17                         |
| <i>K pneumoniae</i> | Urine         | 5                  | 22                | 22                         |
|                     | Wound         | 3                  | 11                | 11                         |
|                     | Aerobic blood | 3                  | 9                 | 9                          |
| <i>P aeruginosa</i> | Urine         | 6                  | 19                | 18                         |
|                     | Wound         | 4                  | 17                | 16                         |
|                     | Sputum        | 5                  | 18                | 18                         |
| <i>P mirabilis</i>  | Urine         | 4                  | 17                | 17                         |
|                     | Wound         | 4                  | 18                | 18                         |
|                     | Aerobic blood | 2                  | 7                 | 4                          |
| <i>S aureus</i>     | Wound         | 4                  | 26                | 25                         |
|                     | Aerobic blood | 2                  | 8                 | 7                          |

\*Maximum number of parents allowed

Note: Initial number of arcs is for models where variables have been removed due not being connected to the resistance variables, or in the case of Ecoli urine, variables removed to allow models to run within a reasonable (2 weeks) amount of time.

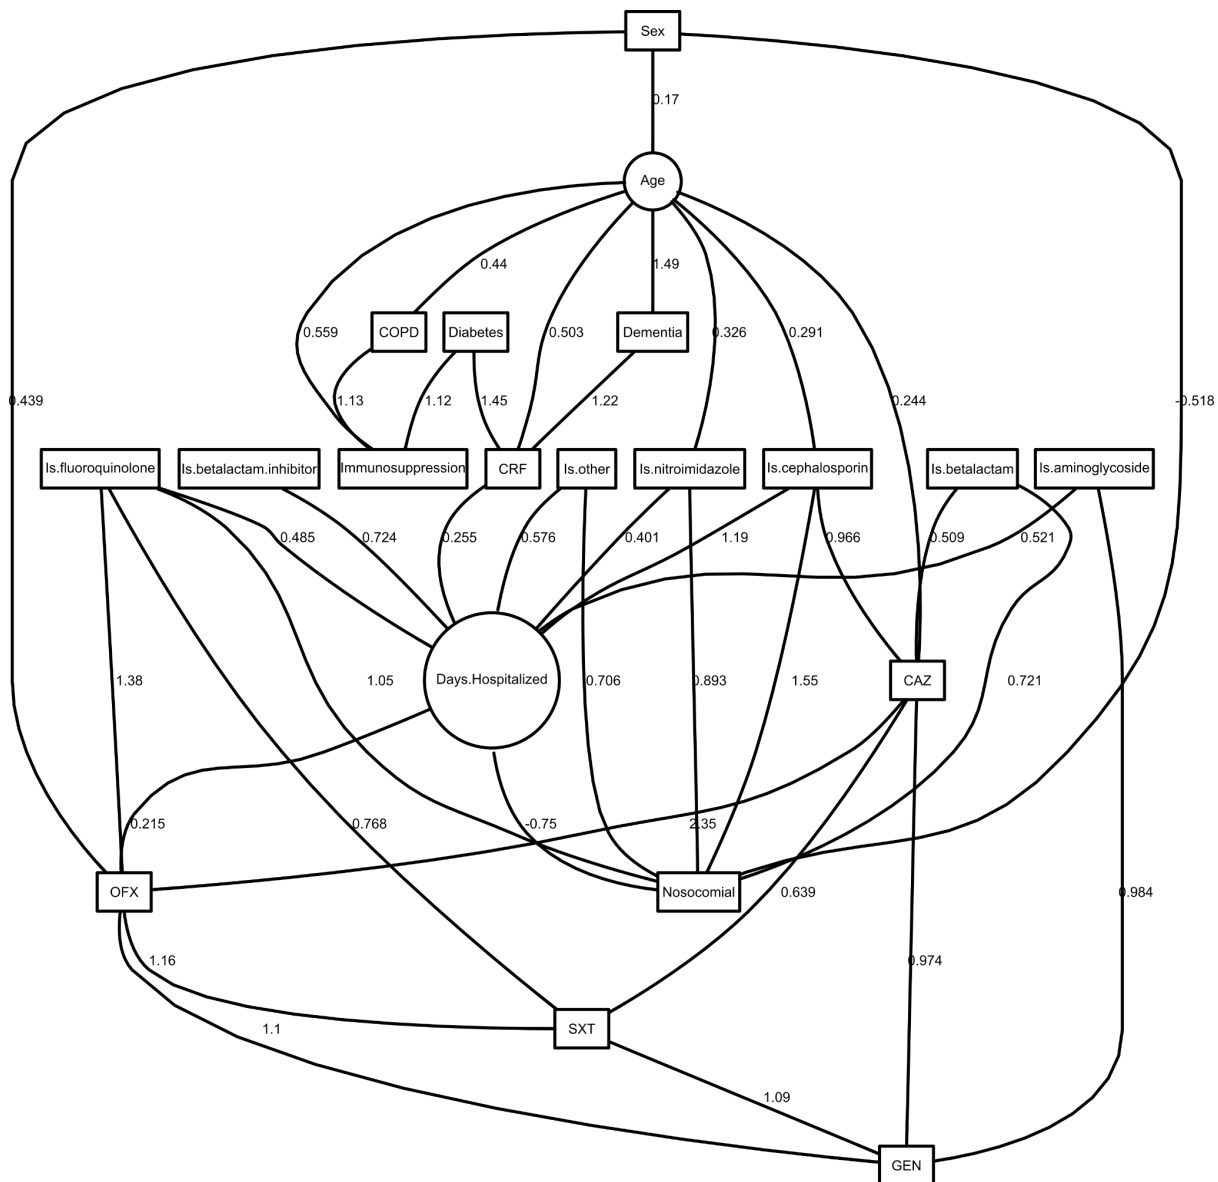

Figure S1: Final DAG for *E coli* in urine.

Table S3: *E coli* in urine parameter estimates and their 95% credible intervals. None of the non-intercept credible intervals contains zero.

| myvec                         | Posterior statistics |        |        |       |
|-------------------------------|----------------------|--------|--------|-------|
|                               | 2.50%                | median | 97.50% | mode  |
| Age (Intercept)               | -0.10                | -0.05  | 0.00   | -0.05 |
| Age Sex                       | 0.08                 | 0.17   | 0.25   | 0.17  |
| Age precision                 | 0.95                 | 1.01   | 1.06   | 1.01  |
| Sex (Intercept)               | -0.91                | -0.82  | -0.74  | -0.82 |
| Immunosuppression (Intercept) | -4.16                | -3.84  | -3.54  | -3.81 |
| Immunosuppression Age         | 0.24                 | 0.57   | 0.92   | 0.56  |

|                                           |       |       |       |       |
|-------------------------------------------|-------|-------|-------|-------|
| Immunosuppression Diabetes                | 0.64  | 1.12  | 1.57  | 1.12  |
| Immunosuppression COPD                    | 0.40  | 1.11  | 1.74  | 1.13  |
| Dementia (Intercept)                      | -3.33 | -3.06 | -2.82 | -3.05 |
| Dementia Age                              | 1.17  | 1.50  | 1.83  | 1.49  |
| Diabetes (Intercept)                      | -1.84 | -1.72 | -1.62 | -1.72 |
| COPD (Intercept)                          | -3.41 | -3.18 | -2.98 | -3.17 |
| COPD Age                                  | 0.19  | 0.44  | 0.71  | 0.44  |
| CRF (Intercept)                           | -3.85 | -3.57 | -3.31 | -3.56 |
| CRF Age                                   | 0.23  | 0.51  | 0.82  | 0.50  |
| CRF Dementia                              | 0.75  | 1.22  | 1.65  | 1.22  |
| CRF Diabetes                              | 1.07  | 1.46  | 1.83  | 1.45  |
| Is.cephalosporin (Intercept)              | -0.78 | -0.70 | -0.61 | -0.70 |
| Is.cephalosporin Age                      | 0.20  | 0.29  | 0.39  | 0.29  |
| Is.betalactam (Intercept)                 | -2.34 | -2.20 | -2.08 | -2.20 |
| Is.betalactam.inhibitor (Intercept)       | -2.57 | -2.41 | -2.28 | -2.41 |
| Is.nitroimidazole (Intercept)             | -2.88 | -2.70 | -2.55 | -2.70 |
| Is.nitroimidazole Age                     | 0.14  | 0.33  | 0.53  | 0.33  |
| Is.aminoglycoside (Intercept)             | -3.11 | -2.91 | -2.74 | -2.91 |
| Is.fluoroquinolone (Intercept)            | -3.61 | -3.38 | -3.17 | -3.38 |
| Is.other (Intercept)                      | -2.76 | -2.59 | -2.45 | -2.59 |
| Days.Hospitalized (Intercept)             | -0.61 | -0.58 | -0.55 | -0.58 |
| Days.Hospitalized CRF                     | 0.15  | 0.25  | 0.36  | 0.26  |
| Days.Hospitalized Is.cephalosporin        | 1.13  | 1.19  | 1.24  | 1.19  |
| Days.Hospitalized Is.betalactam.inhibitor | 0.63  | 0.72  | 0.81  | 0.72  |
| Days.Hospitalized Is.nitroimidazole       | 0.29  | 0.40  | 0.51  | 0.40  |
| Days.Hospitalized Is.aminoglycoside       | 0.40  | 0.52  | 0.63  | 0.52  |
| Days.Hospitalized Is.fluoroquinolone      | 0.34  | 0.48  | 0.62  | 0.49  |
| Days.Hospitalized Is.other                | 0.47  | 0.57  | 0.67  | 0.58  |
| Days.Hospitalized precision               | 2.49  | 2.64  | 2.79  | 2.65  |
| Nosocomial (Intercept)                    | -2.18 | -1.99 | -1.82 | -1.99 |
| Nosocomial Sex                            | -0.77 | -0.52 | -0.29 | -0.52 |
| Nosocomial Is.cephalosporin               | 1.26  | 1.57  | 1.86  | 1.55  |
| Nosocomial Is.betalactam                  | 0.36  | 0.73  | 1.06  | 0.72  |
| Nosocomial Is.nitroimidazole              | 0.50  | 0.90  | 1.29  | 0.89  |
| Nosocomial Is.fluoroquinolone             | 0.51  | 1.06  | 1.59  | 1.05  |
| Nosocomial Is.other                       | 0.32  | 0.71  | 1.07  | 0.71  |
| Nosocomial Days.Hospitalized              | -0.94 | -0.76 | -0.59 | -0.75 |



|                              |      |       |       |       |
|------------------------------|------|-------|-------|-------|
| Nosocomial Is.other          | 1.38 | 2.04  | 2.93  | 2.03  |
| Nosocomial Days.Hospitalized | 0.39 | 0.47  | 0.55  | 0.47  |
| CAZ Age                      | 1.16 | 1.28  | 1.40  | 1.28  |
| CAZ Is.cephalosporin         | 2.19 | 2.64  | 3.15  | 2.63  |
| CAZ Is.betalactam            | 1.24 | 1.67  | 2.20  | 1.66  |
| GEN Is.aminoglycoside        | 1.69 | 2.70  | 4.14  | 2.67  |
| GEN CAZ                      | 2.01 | 2.66  | 3.50  | 2.65  |
| GEN OFX                      | 2.25 | 3.02  | 3.99  | 3.00  |
| GEN SXT                      | 2.30 | 3.00  | 3.87  | 2.99  |
| OFX Sex                      | 1.25 | 1.56  | 1.91  | 1.55  |
| OFX Is.fluoroquinolone       | 2.29 | 3.99  | 7.10  | 3.99  |
| OFX Days.Hospitalized        | 1.12 | 1.24  | 1.37  | 1.24  |
| OFX CAZ                      | 8.61 | 10.50 | 12.90 | 10.48 |
| SXT Is.fluoroquinolone       | 1.31 | 2.18  | 3.53  | 2.16  |
| SXT CAZ                      | 1.53 | 1.90  | 2.32  | 1.90  |
| SXT OFX                      | 2.60 | 3.21  | 3.94  | 3.20  |

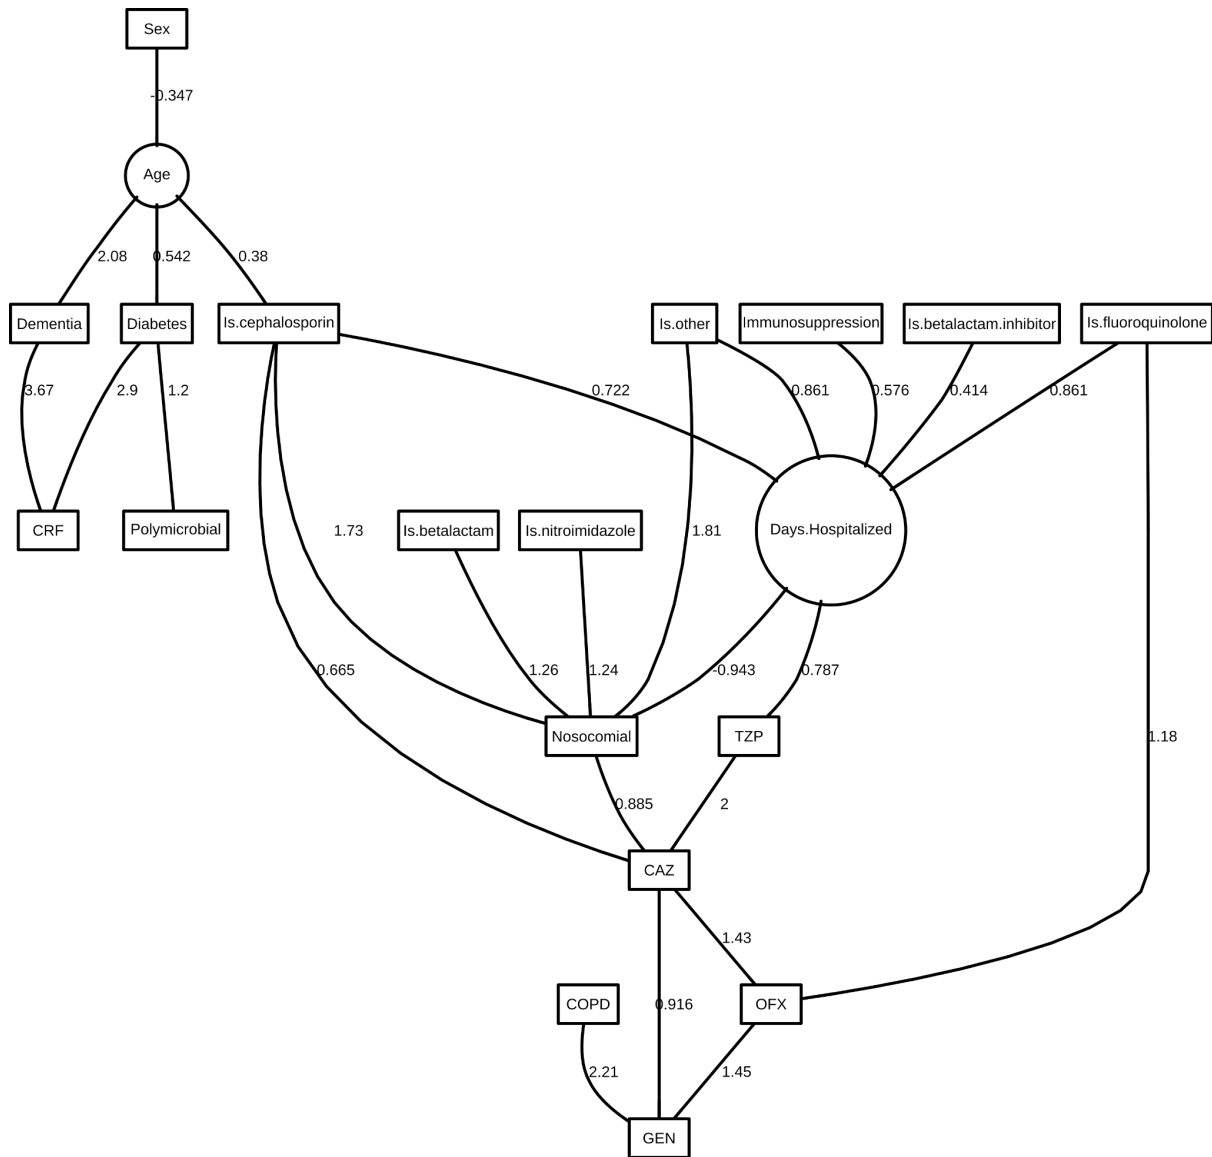

Figure S2: Final DAG for *E coli* in wound.

Table S4: *E coli* in wound parameter estimates and their 95% credible intervals. None of the non-intercept credible intervals contains zero.

|                               | Posterior statistics |        |        |       |
|-------------------------------|----------------------|--------|--------|-------|
|                               | 2.50%                | median | 97.50% | mode  |
| myvec                         |                      |        |        |       |
| Age (Intercept)               | 0.07                 | 0.20   | 0.32   | 0.20  |
| Age Sex                       | -0.51                | -0.34  | -0.19  | -0.35 |
| Age precision                 | 0.91                 | 1.03   | 1.15   | 1.03  |
| Sex (Intercept)               | 0.14                 | 0.31   | 0.47   | 0.31  |
| Immunosuppression (Intercept) | -3.70                | -3.23  | -2.84  | -3.22 |
| Dementia (Intercept)          | -7.59                | -5.67  | -4.39  | -5.49 |
| Dementia Age                  | 1.03                 | 2.18   | 3.58   | 2.08  |



|                                           |       |       |       |       |
|-------------------------------------------|-------|-------|-------|-------|
| Diabetes (Intercept)                      | -2.00 | -1.74 | -1.51 | -1.73 |
| Diabetes Age                              | 0.29  | 0.55  | 0.80  | 0.54  |
| COPD (Intercept)                          | -4.35 | -3.74 | -3.25 | -3.73 |
| CRF (Intercept)                           | -6.21 | -4.92 | -4.05 | -4.84 |
| CRF Dementia                              | 1.71  | 3.71  | 5.49  | 3.67  |
| CRF Diabetes                              | 1.84  | 3.00  | 4.31  | 2.90  |
| Is.cephalosporin (Intercept)              | -0.06 | 0.11  | 0.28  | 0.11  |
| Is.cephalosporin Age                      | 0.21  | 0.38  | 0.55  | 0.38  |
| Is.betalactam (Intercept)                 | -0.93 | -0.74 | -0.57 | -0.74 |
| Is.betalactam.inhibitor (Intercept)       | -1.62 | -1.40 | -1.20 | -1.40 |
| Is.nitroimidazole (Intercept)             | -0.89 | -0.70 | -0.54 | -0.71 |
| Is.fluoroquinolone (Intercept)            | -2.99 | -2.64 | -2.34 | -2.63 |
| Is.other (Intercept)                      | -2.56 | -2.28 | -2.00 | -2.27 |
| Days.Hospitalized (Intercept)             | -0.73 | -0.62 | -0.52 | -0.62 |
| Days.Hospitalized Immunosuppression       | 0.22  | 0.57  | 0.92  | 0.58  |
| Days.Hospitalized Is.cephalosporin        | 0.58  | 0.72  | 0.85  | 0.72  |
| Days.Hospitalized Is.betalactam.inhibitor | 0.24  | 0.41  | 0.58  | 0.41  |
| Days.Hospitalized Is.fluoroquinolone      | 0.58  | 0.86  | 1.13  | 0.86  |
| Days.Hospitalized Is.other                | 0.63  | 0.86  | 1.09  | 0.86  |
| Days.Hospitalized precision               | 1.37  | 1.55  | 1.73  | 1.56  |
| Nosocomial (Intercept)                    | -1.56 | -1.22 | -0.88 | -1.19 |
| Nosocomial Is.cephalosporin               | 1.24  | 1.77  | 2.27  | 1.73  |
| Nosocomial Is.betalactam                  | 0.80  | 1.28  | 1.75  | 1.26  |
| Nosocomial Is.nitroimidazole              | 0.72  | 1.25  | 1.80  | 1.24  |
| Nosocomial Is.other                       | 0.99  | 1.86  | 2.78  | 1.81  |
| Nosocomial Days.Hospitalized              | -1.26 | -0.96 | -0.70 | -0.94 |
| Polymicrobial (Intercept)                 | 0.57  | 0.76  | 0.95  | 0.76  |
| Polymicrobial Diabetes                    | 0.59  | 1.22  | 1.92  | 1.20  |
| CAZ (Intercept)                           | -2.45 | -2.02 | -1.62 | -2.00 |
| CAZ Is.cephalosporin                      | 0.25  | 0.67  | 1.08  | 0.66  |
| CAZ Nosocomial                            | 0.45  | 0.90  | 1.35  | 0.89  |
| CAZ TZP                                   | 1.05  | 2.06  | 3.12  | 2.00  |
| GEN (Intercept)                           | -2.90 | -2.51 | -2.16 | -2.50 |
| GEN COPD                                  | 1.01  | 2.23  | 3.41  | 2.21  |
| GEN CAZ                                   | 0.42  | 0.93  | 1.42  | 0.92  |
| GEN OFX                                   | 0.96  | 1.46  | 1.95  | 1.45  |
| OFX (Intercept)                           | -2.00 | -1.71 | -1.45 | -1.70 |

|                              |       |        |        |       |
|------------------------------|-------|--------|--------|-------|
| OFX Is.fluoroquinolone       | 0.45  | 1.20   | 1.89   | 1.18  |
| OFX CAZ                      | 1.03  | 1.44   | 1.84   | 1.43  |
| TZP (Intercept)              | -4.26 | -3.63  | -3.13  | -3.60 |
| TZP Days.Hospitalized        | 0.40  | 0.80   | 1.19   | 0.79  |
|                              |       |        |        |       |
|                              | OR    |        |        |       |
|                              | 2.50% | median | 97.50% | mode  |
| Age Sex                      | 0.60  | 0.71   | 0.83   | 0.71  |
| Dementia Age                 | 2.79  | 8.88   | 35.97  | 7.97  |
| Diabetes Age                 | 1.34  | 1.73   | 2.23   | 1.72  |
| CRF Dementia                 | 5.51  | 40.89  | 242.73 | 39.40 |
| CRF Diabetes                 | 6.29  | 20.08  | 74.17  | 18.23 |
| Is.cephalosporin Age         | 1.23  | 1.46   | 1.73   | 1.46  |
| Nosocomial Is.cephalosporin  | 3.46  | 5.84   | 9.67   | 5.65  |
| Nosocomial Is.betalactam     | 2.22  | 3.58   | 5.77   | 3.53  |
| Nosocomial Is.nitroimidazole | 2.05  | 3.49   | 6.06   | 3.46  |
| Nosocomial Is.other          | 2.68  | 6.44   | 16.06  | 6.11  |
| Nosocomial Days.Hospitalized | 0.28  | 0.38   | 0.50   | 0.39  |
| Polymicrobial Diabetes       | 1.80  | 3.40   | 6.79   | 3.31  |
| CAZ Is.cephalosporin         | 1.29  | 1.96   | 2.93   | 1.94  |
| CAZ Nosocomial               | 1.57  | 2.46   | 3.86   | 2.42  |
| CAZ TZP                      | 2.85  | 7.86   | 22.64  | 7.35  |
| GEN COPD                     | 2.73  | 9.31   | 30.21  | 9.09  |
| GEN CAZ                      | 1.52  | 2.53   | 4.12   | 2.50  |
| GEN OFX                      | 2.62  | 4.29   | 7.02   | 4.26  |
| OFX Is.fluoroquinolone       | 1.57  | 3.31   | 6.60   | 3.27  |
| OFX CAZ                      | 2.79  | 4.23   | 6.31   | 4.19  |
| TZP Days.Hospitalized        | 1.49  | 2.23   | 3.27   | 2.20  |

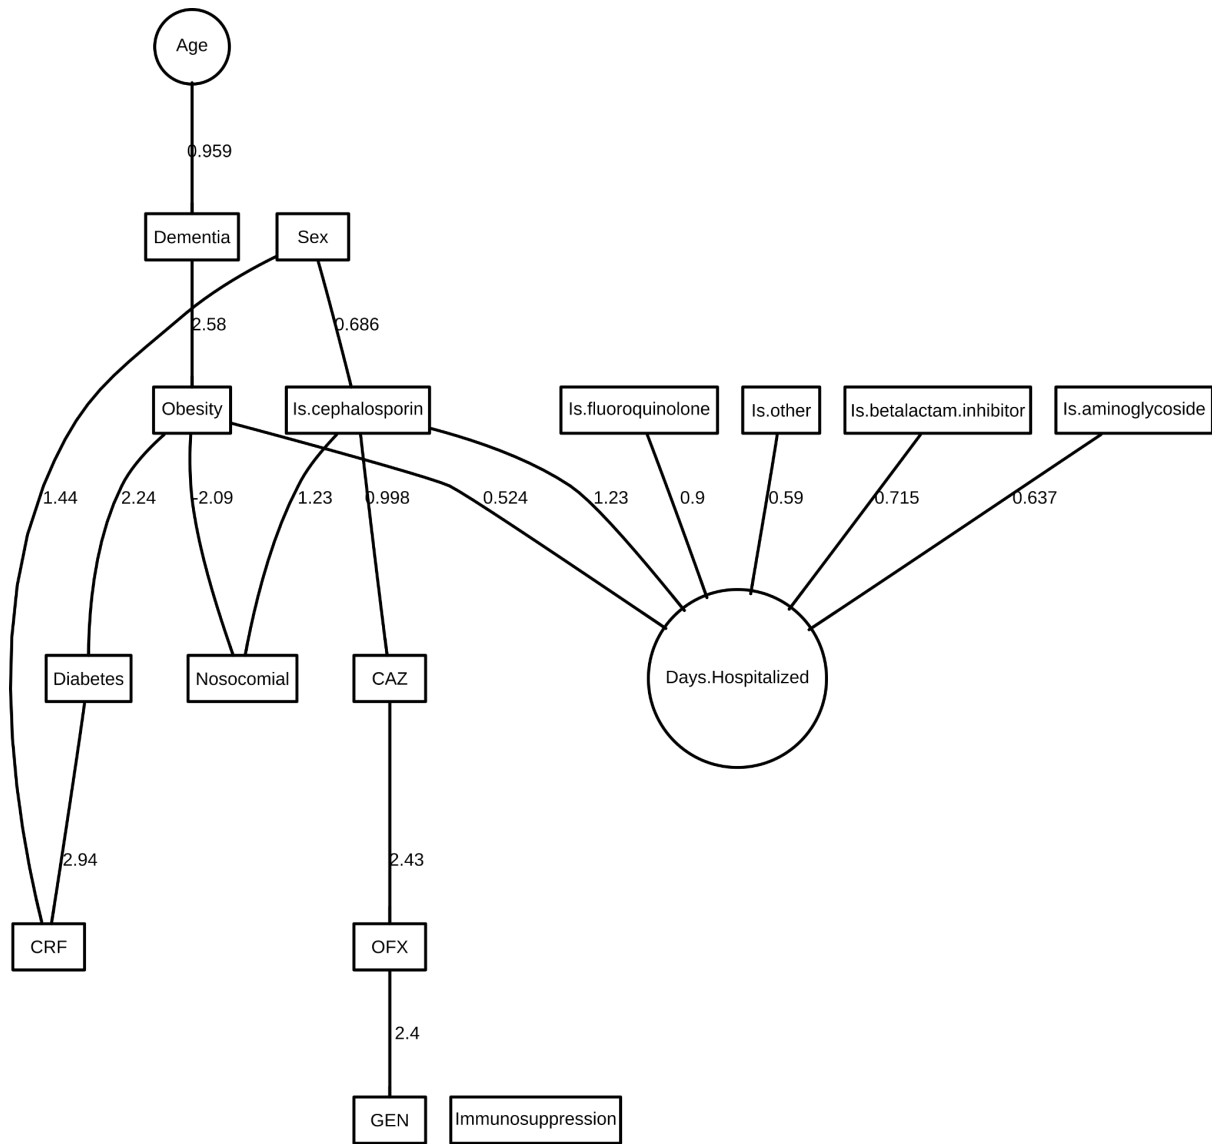

Figure S3: Final DAG for *E coli* in aerobic blood.

Table S5: *E coli* in aerobic blood parameter estimates and their 95% credible intervals. None of the non-intercept credible intervals contains zero.

|                               | Posterior statistics |        |        |       |  |
|-------------------------------|----------------------|--------|--------|-------|--|
|                               | 2.50%                | median | 97.50% | mode  |  |
| myvec                         |                      |        |        |       |  |
| Age (Intercept)               | -0.11                | 0.00   | 0.10   | 0.00  |  |
| Age precision                 | 0.86                 | 1.01   | 1.15   | 1.00  |  |
| Sex (Intercept)               | -0.65                | -0.43  | -0.22  | -0.43 |  |
| Immunosuppression (Intercept) | -3.17                | -2.71  | -2.32  | -2.71 |  |
| Dementia (Intercept)          | -3.76                | -3.09  | -2.59  | -3.05 |  |
| Dementia Age                  | 0.35                 | 1.00   | 1.73   | 0.96  |  |
| Diabetes (Intercept)          | -2.21                | -1.88  | -1.58  | -1.87 |  |

|                                           |       |        |        |       |
|-------------------------------------------|-------|--------|--------|-------|
| Diabetes Obesity                          | 1.31  | 2.28   | 3.21   | 2.24  |
| CRF (Intercept)                           | -6.18 | -4.85  | -3.88  | -4.74 |
| CRF Sex                                   | 0.45  | 1.51   | 2.60   | 1.44  |
| CRF Diabetes                              | 2.01  | 3.01   | 4.09   | 2.94  |
| Obesity (Intercept)                       | -3.83 | -3.22  | -2.72  | -3.21 |
| Obesity Dementia                          | 1.48  | 2.57   | 3.62   | 2.58  |
| Is.cephalosporin (Intercept)              | -0.99 | -0.70  | -0.43  | -0.70 |
| Is.cephalosporin Sex                      | 0.24  | 0.70   | 1.11   | 0.69  |
| Is.betalactam.inhibitor (Intercept)       | -2.73 | -2.33  | -2.00  | -2.33 |
| Is.aminoglycoside (Intercept)             | -3.64 | -3.09  | -2.63  | -3.07 |
| Is.fluoroquinolone (Intercept)            | -4.94 | -4.04  | -3.35  | -3.98 |
| Is.other (Intercept)                      | -3.30 | -2.81  | -2.40  | -2.80 |
| Days.Hospitalized (Intercept)             | -0.74 | -0.66  | -0.58  | -0.66 |
| Days.Hospitalized Obesity                 | 0.26  | 0.52   | 0.77   | 0.52  |
| Days.Hospitalized Is.cephalosporin        | 1.09  | 1.22   | 1.36   | 1.23  |
| Days.Hospitalized Is.betalactam.inhibitor | 0.48  | 0.72   | 0.94   | 0.71  |
| Days.Hospitalized Is.aminoglycoside       | 0.33  | 0.63   | 0.94   | 0.64  |
| Days.Hospitalized Is.fluoroquinolone      | 0.43  | 0.89   | 1.35   | 0.90  |
| Days.Hospitalized Is.other                | 0.31  | 0.58   | 0.86   | 0.59  |
| Days.Hospitalized precision               | 2.50  | 2.93   | 3.36   | 2.97  |
| Nosocomial (Intercept)                    | -2.20 | -1.80  | -1.43  | -1.78 |
| Nosocomial Obesity                        | -5.85 | -2.41  | -0.68  | -2.09 |
| Nosocomial Is.cephalosporin               | 0.72  | 1.23   | 1.77   | 1.23  |
| CAZ (Intercept)                           | -1.97 | -1.60  | -1.26  | -1.59 |
| CAZ Is.cephalosporin                      | 0.50  | 1.01   | 1.49   | 1.00  |
| GEN (Intercept)                           | -4.10 | -3.35  | -2.78  | -3.32 |
| GEN OFX                                   | 1.65  | 2.44   | 3.26   | 2.40  |
| OFX (Intercept)                           | -2.31 | -1.93  | -1.60  | -1.92 |
| OFX CAZ                                   | 1.88  | 2.43   | 3.01   | 2.43  |
|                                           |       |        |        |       |
|                                           | OR    |        |        |       |
|                                           | 2.50% | median | 97.50% | mode  |
| Dementia Age                              | 1.42  | 2.72   | 5.66   | 2.61  |
| Diabetes Obesity                          | 3.70  | 9.77   | 24.87  | 9.41  |
| CRF Sex                                   | 1.57  | 4.52   | 13.51  | 4.22  |
| CRF Diabetes                              | 7.45  | 20.23  | 59.68  | 18.95 |
| Obesity Dementia                          | 4.41  | 13.12  | 37.46  | 13.17 |

|                             |      |       |       |       |
|-----------------------------|------|-------|-------|-------|
| Is.cephalosporin Sex        | 1.28 | 2.00  | 3.03  | 1.99  |
| Nosocomial Obesity          | 0.00 | 0.09  | 0.50  | 0.12  |
| Nosocomial Is.cephalosporin | 2.05 | 3.43  | 5.85  | 3.43  |
| CAZ Is.cephalosporin        | 1.66 | 2.74  | 4.44  | 2.71  |
| GEN OFX                     | 5.23 | 11.49 | 26.09 | 11.03 |
| OFX CAZ                     | 6.56 | 11.39 | 20.22 | 11.33 |

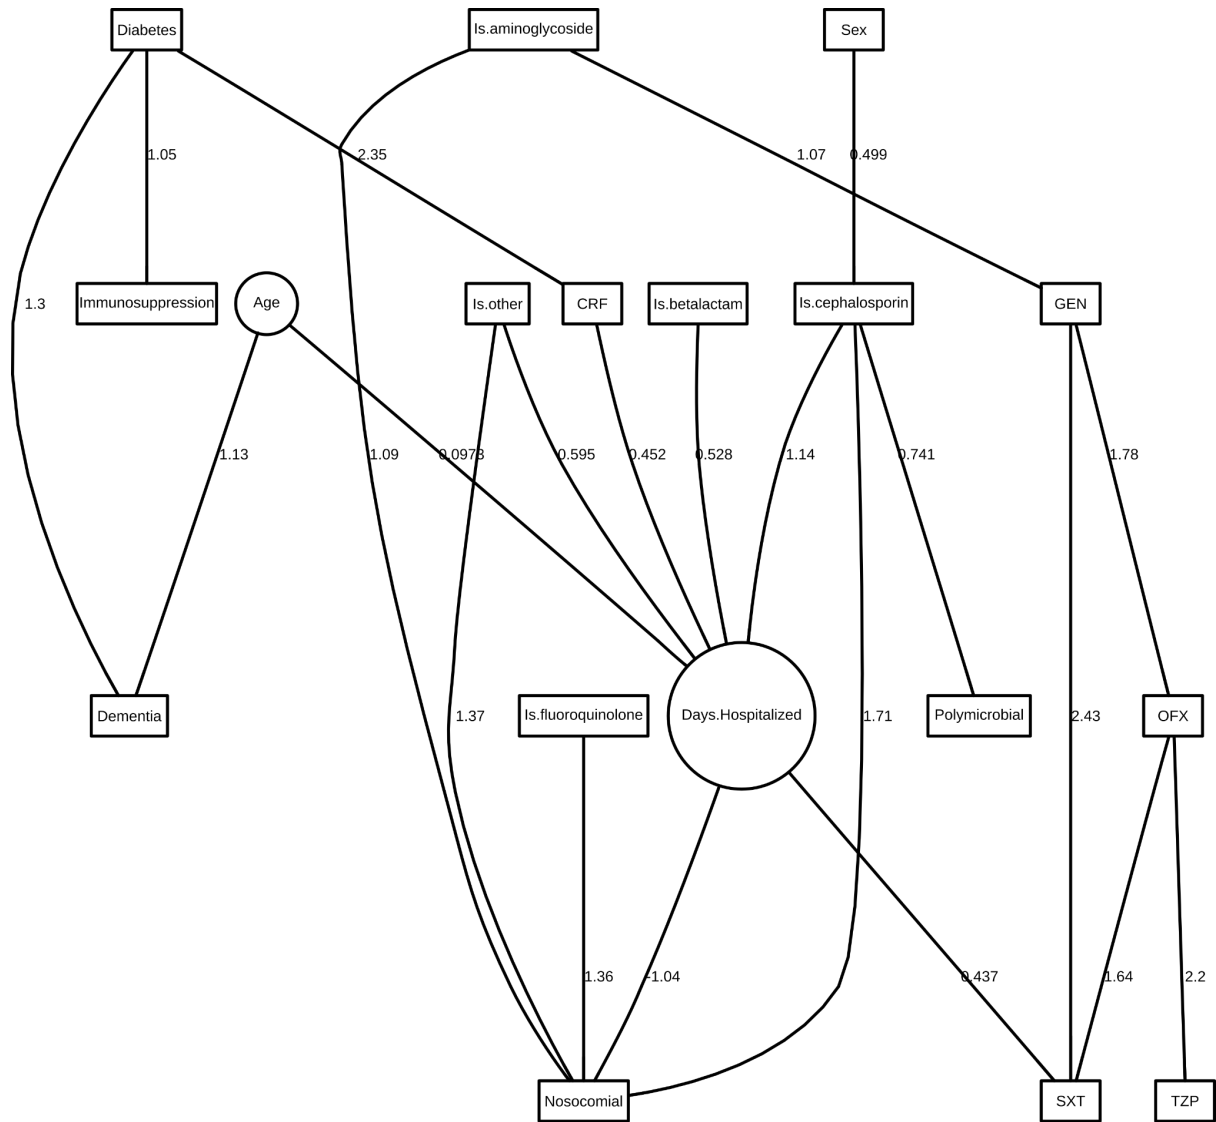

Figure S4: Final DAG for *K pneumoniae* in urine.

Table S6: *K pneumoniae* in urine parameter estimates and their 95% credible intervals. None of the non-intercept credible intervals contains zero.

| myvec | Posterior statistics |        |        |      |
|-------|----------------------|--------|--------|------|
|       | 2.50%                | median | 97.50% | mode |
|       |                      |        |        |      |

|                                    |       |       |       |       |
|------------------------------------|-------|-------|-------|-------|
| Age (Intercept)                    | -0.07 | 0.00  | 0.07  | 0.00  |
| Age precision                      | 0.90  | 1.00  | 1.10  | 1.00  |
| Sex (Intercept)                    | -0.48 | -0.33 | -0.20 | -0.33 |
| Immunosuppression (Intercept)      | -3.61 | -3.17 | -2.80 | -3.16 |
| Immunosuppression Diabetes         | 0.38  | 1.04  | 1.68  | 1.05  |
| Dementia (Intercept)               | -3.65 | -3.17 | -2.75 | -3.14 |
| Dementia Age                       | 0.67  | 1.15  | 1.66  | 1.13  |
| Dementia Diabetes                  | 0.72  | 1.31  | 1.88  | 1.30  |
| Diabetes (Intercept)               | -1.59 | -1.41 | -1.24 | -1.41 |
| CRF (Intercept)                    | -4.17 | -3.62 | -3.16 | -3.60 |
| CRF Diabetes                       | 1.75  | 2.38  | 3.00  | 2.35  |
| Is.cephalosporin (Intercept)       | -0.56 | -0.36 | -0.18 | -0.36 |
| Is.cephalosporin Sex               | 0.20  | 0.51  | 0.78  | 0.50  |
| Is.betalactam (Intercept)          | -1.85 | -1.65 | -1.47 | -1.65 |
| Is.aminoglycoside (Intercept)      | -2.63 | -2.36 | -2.12 | -2.36 |
| Is.fluoroquinolone (Intercept)     | -3.30 | -2.96 | -2.65 | -2.94 |
| Is.other (Intercept)               | -2.46 | -2.21 | -1.99 | -2.21 |
| Days.Hospitalized (Intercept)      | -0.77 | -0.70 | -0.63 | -0.70 |
| Days.Hospitalized Age              | 0.05  | 0.10  | 0.15  | 0.10  |
| Days.Hospitalized CRF              | 0.25  | 0.45  | 0.65  | 0.45  |
| Days.Hospitalized Is.cephalosporin | 1.03  | 1.13  | 1.24  | 1.14  |
| Days.Hospitalized Is.betalactam    | 0.38  | 0.52  | 0.66  | 0.53  |
| Days.Hospitalized Is.other         | 0.43  | 0.59  | 0.76  | 0.60  |
| Days.Hospitalized precision        | 1.88  | 2.09  | 2.30  | 2.10  |
| Nosocomial (Intercept)             | -2.34 | -2.01 | -1.71 | -2.00 |
| Nosocomial Is.cephalosporin        | 1.27  | 1.73  | 2.18  | 1.71  |
| Nosocomial Is.aminoglycoside       | 0.48  | 1.11  | 1.72  | 1.09  |
| Nosocomial Is.fluoroquinolone      | 0.59  | 1.38  | 2.17  | 1.36  |
| Nosocomial Is.other                | 0.79  | 1.38  | 1.96  | 1.37  |
| Nosocomial Days.Hospitalized       | -1.35 | -1.06 | -0.80 | -1.04 |
| Polymicrobial (Intercept)          | -2.35 | -2.03 | -1.75 | -2.03 |
| Polymicrobial Is.cephalosporin     | 0.34  | 0.75  | 1.13  | 0.74  |
| GEN (Intercept)                    | -1.65 | -1.46 | -1.27 | -1.45 |
| GEN Is.aminoglycoside              | 0.52  | 1.06  | 1.58  | 1.07  |
| OFX (Intercept)                    | -2.91 | -2.57 | -2.29 | -2.57 |
| OFX GEN                            | 1.33  | 1.78  | 2.23  | 1.78  |
| SXT (Intercept)                    | -1.20 | -1.01 | -0.83 | -1.01 |

|                                |       |        |        |       |
|--------------------------------|-------|--------|--------|-------|
| SXT Days.Hospitalized          | 0.27  | 0.44   | 0.60   | 0.44  |
| SXT GEN                        | 1.97  | 2.44   | 2.96   | 2.43  |
| SXT OFX                        | 1.07  | 1.64   | 2.27   | 1.64  |
| TZP (Intercept)                | -4.42 | -3.84  | -3.38  | -3.82 |
| TZP OFX                        | 1.44  | 2.22   | 2.96   | 2.20  |
|                                |       |        |        |       |
|                                | OR    |        |        |       |
|                                | 2.50% | median | 97.50% | mode  |
| Immunosuppression Diabetes     | 1.46  | 2.84   | 5.37   | 2.87  |
| Dementia Age                   | 1.95  | 3.17   | 5.25   | 3.09  |
| Dementia Diabetes              | 2.06  | 3.71   | 6.54   | 3.67  |
| CRF Diabetes                   | 5.76  | 10.75  | 20.07  | 10.53 |
| Is.cephalosporin Sex           | 1.22  | 1.66   | 2.19   | 1.65  |
| Nosocomial Is.cephalosporin    | 3.58  | 5.63   | 8.87   | 5.55  |
| Nosocomial Is.aminoglycoside   | 1.61  | 3.04   | 5.59   | 2.99  |
| Nosocomial Is.fluoroquinolone  | 1.81  | 3.98   | 8.78   | 3.90  |
| Nosocomial Is.other            | 2.20  | 3.96   | 7.12   | 3.92  |
| Nosocomial Days.Hospitalized   | 0.26  | 0.35   | 0.45   | 0.35  |
| Polymicrobial Is.cephalosporin | 1.40  | 2.12   | 3.09   | 2.10  |
| GEN Is.aminoglycoside          | 1.68  | 2.89   | 4.87   | 2.92  |
| OFX GEN                        | 3.77  | 5.93   | 9.34   | 5.95  |
| SXT Days.Hospitalized          | 1.31  | 1.55   | 1.83   | 1.55  |
| SXT GEN                        | 7.19  | 11.53  | 19.22  | 11.40 |
| SXT OFX                        | 2.91  | 5.17   | 9.64   | 5.14  |
| TZP OFX                        | 4.21  | 9.17   | 19.35  | 9.03  |

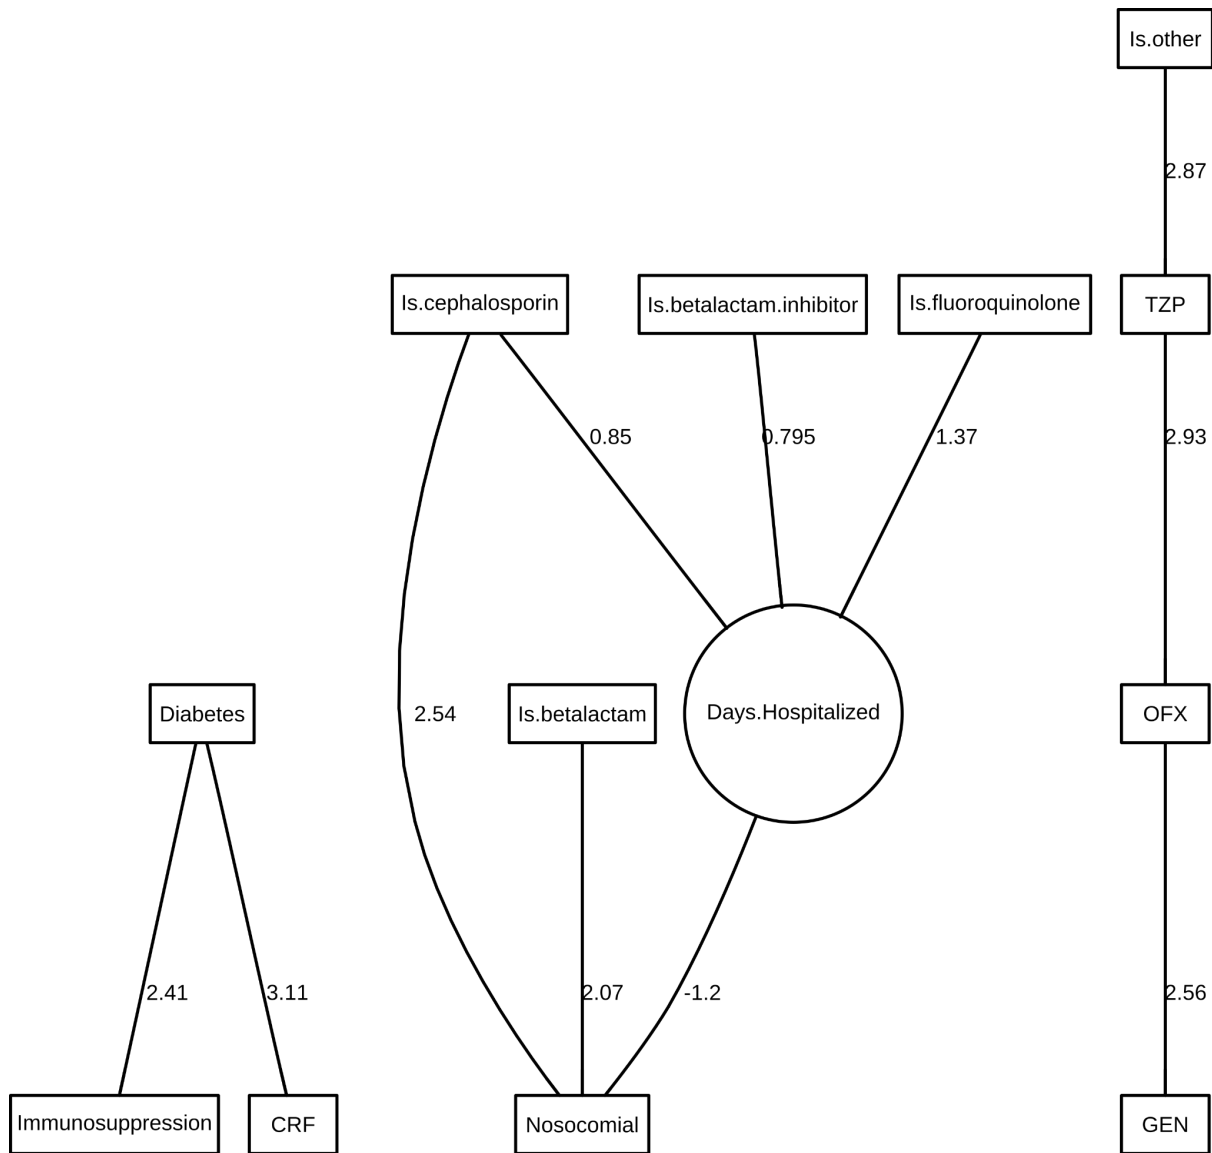

Figure S5: Final DAG for *K pneumoniae* in wound.

Table S7: *K pneumoniae* in wound parameter estimates and their 95% credible intervals. None of the non-intercept credible intervals contains zero.

|                               | Posterior statistics |        |        |       |
|-------------------------------|----------------------|--------|--------|-------|
|                               | 2.50%                | median | 97.50% | mode  |
| myvec                         |                      |        |        |       |
| Immunosuppression (Intercept) | -6.56                | -4.58  | -3.34  | -4.38 |
| Immunosuppression Diabetes    | 0.96                 | 2.51   | 4.56   | 2.41  |
| Diabetes (Intercept)          | -1.37                | -1.05  | -0.75  | -1.04 |
| CRF (Intercept)               | -5.59                | -4.09  | -3.08  | -3.97 |
| CRF Diabetes                  | 2.00                 | 3.23   | 4.78   | 3.11  |
| Is.cephalosporin (Intercept)  | 0.28                 | 0.57   | 0.85   | 0.57  |
| Is.betalactam (Intercept)     | -0.84                | -0.55  | -0.28  | -0.55 |



|                                           |       |        |        |       |
|-------------------------------------------|-------|--------|--------|-------|
| Is.betalactam.inhibitor (Intercept)       | -1.37 | -1.05  | -0.75  | -1.04 |
| Is.fluoroquinolone (Intercept)            | -3.33 | -2.71  | -2.19  | -2.68 |
| Is.other (Intercept)                      | -2.32 | -1.89  | -1.51  | -1.88 |
| Days.Hospitalized (Intercept)             | -1.02 | -0.83  | -0.66  | -0.84 |
| Days.Hospitalized Is.cephalosporin        | 0.63  | 0.85   | 1.06   | 0.85  |
| Days.Hospitalized Is.betalactam.inhibitor | 0.56  | 0.79   | 1.02   | 0.80  |
| Days.Hospitalized Is.fluoroquinolone      | 0.95  | 1.37   | 1.78   | 1.37  |
| Days.Hospitalized precision               | 1.46  | 1.79   | 2.14   | 1.81  |
| Nosocomial (Intercept)                    | -2.15 | -1.43  | -0.78  | -1.40 |
| Nosocomial Is.cephalosporin               | 1.74  | 2.60   | 3.53   | 2.54  |
| Nosocomial Is.betalactam                  | 1.27  | 2.12   | 3.05   | 2.07  |
| Nosocomial Days.Hospitalized              | -1.77 | -1.24  | -0.76  | -1.20 |
| GEN (Intercept)                           | -2.07 | -1.65  | -1.27  | -1.64 |
| GEN OFX                                   | 1.68  | 2.58   | 3.55   | 2.56  |
| OFX (Intercept)                           | -2.76 | -2.24  | -1.82  | -2.24 |
| OFX TZP                                   | 1.65  | 2.98   | 4.42   | 2.93  |
| TZP (Intercept)                           | -5.20 | -3.92  | -3.03  | -3.84 |
| TZP Is.other                              | 1.62  | 2.92   | 4.39   | 2.87  |
|                                           |       |        |        |       |
|                                           | OR    |        |        |       |
|                                           | 2.50% | median | 97.50% | mode  |
| Immunosuppression Diabetes                | 2.61  | 12.36  | 95.92  | 11.16 |
| CRF Diabetes                              | 7.37  | 25.20  | 118.68 | 22.47 |
| Nosocomial Is.cephalosporin               | 5.68  | 13.46  | 34.27  | 12.72 |
| Nosocomial Is.betalactam                  | 3.56  | 8.37   | 21.14  | 7.96  |
| Nosocomial Days.Hospitalized              | 0.17  | 0.29   | 0.47   | 0.30  |
| GEN OFX                                   | 5.37  | 13.20  | 34.95  | 12.90 |
| OFX TZP                                   | 5.21  | 19.69  | 82.87  | 18.67 |
| TZP Is.other                              | 5.05  | 18.62  | 80.36  | 17.68 |

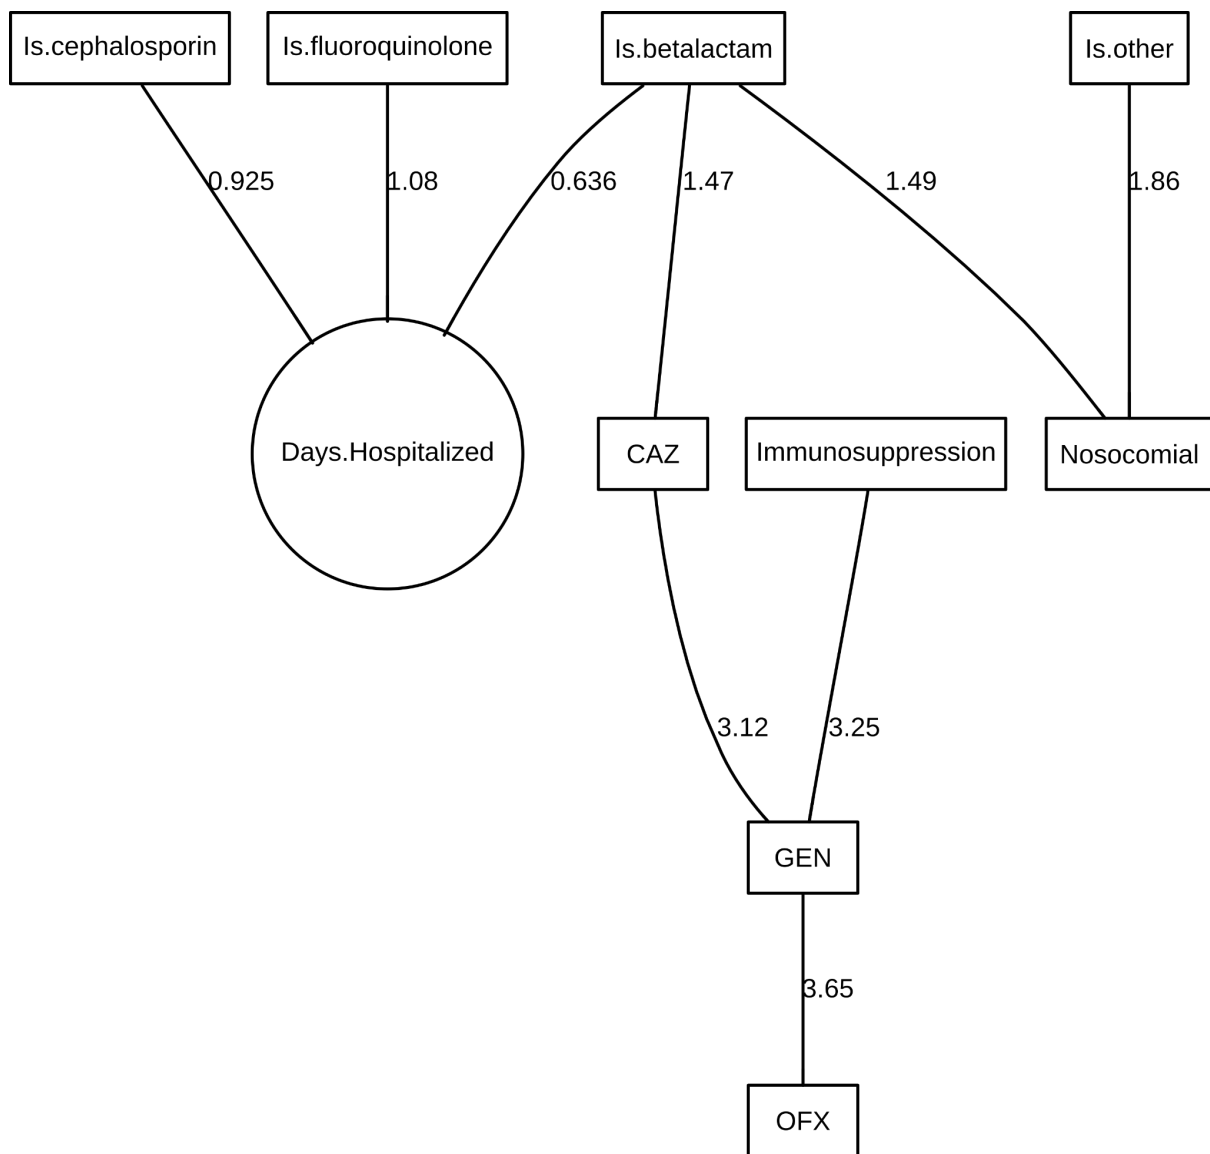

Figure S6: Final DAG for *K pneumoniae* in aerobic blood.

Table S8: *K pneumoniae* in aerobic blood parameter estimates and their 95% credible intervals. None of the non-intercept credible intervals contains zero.

|                                    | Posterior statistics |        |        |       |
|------------------------------------|----------------------|--------|--------|-------|
|                                    | 2.50%                | median | 97.50% | mode  |
| myvec                              |                      |        |        |       |
| Immunosuppression (Intercept)      | -3.88                | -2.88  | -2.13  | -2.83 |
| Is.cephalosporin (Intercept)       | -0.20                | 0.19   | 0.57   | 0.19  |
| Is.betalactam (Intercept)          | -1.76                | -1.27  | -0.83  | -1.25 |
| Is.fluoroquinolone (Intercept)     | -3.88                | -2.88  | -2.13  | -2.83 |
| Is.other (Intercept)               | -2.36                | -1.76  | -1.27  | -1.75 |
| Days.Hospitalized (Intercept)      | -0.92                | -0.70  | -0.50  | -0.71 |
| Days.Hospitalized Is.cephalosporin | 0.62                 | 0.92   | 1.22   | 0.92  |

|                                      |       |        |        |       |
|--------------------------------------|-------|--------|--------|-------|
| Days.Hospitalized Is.betalactam      | 0.27  | 0.63   | 0.98   | 0.64  |
| Days.Hospitalized Is.fluoroquinolone | 0.41  | 1.07   | 1.72   | 1.08  |
| Days.Hospitalized precision          | 1.36  | 1.81   | 2.37   | 1.87  |
| Nosocomial (Intercept)               | -1.53 | -0.97  | -0.47  | -0.95 |
| Nosocomial Is.betalactam             | 0.52  | 1.54   | 2.60   | 1.49  |
| Nosocomial Is.other                  | 0.68  | 1.94   | 3.36   | 1.86  |
| CAZ (Intercept)                      | -1.88 | -1.32  | -0.80  | -1.30 |
| CAZ Is.betalactam                    | 0.48  | 1.48   | 2.48   | 1.47  |
| GEN (Intercept)                      | -4.81 | -3.32  | -2.27  | -3.17 |
| GEN Immunosuppression                | 1.19  | 3.49   | 6.06   | 3.25  |
| GEN CAZ                              | 1.90  | 3.26   | 4.84   | 3.12  |
| OFX (Intercept)                      | -5.93 | -3.93  | -2.68  | -3.75 |
| OFX GEN                              | 2.22  | 3.83   | 5.93   | 3.65  |
|                                      |       |        |        |       |
|                                      | OR    |        |        |       |
|                                      | 2.50% | median | 97.50% | mode  |
| Nosocomial Is.betalactam             | 1.69  | 4.67   | 13.42  | 4.44  |
| Nosocomial Is.other                  | 1.97  | 6.95   | 28.67  | 6.40  |
| CAZ Is.betalactam                    | 1.62  | 4.39   | 11.93  | 4.33  |
| GEN Immunosuppression                | 3.28  | 32.67  | 428.46 | 25.79 |
| GEN CAZ                              | 6.67  | 25.98  | 126.93 | 22.55 |
| OFX GEN                              | 9.17  | 45.91  | 375.41 | 38.46 |

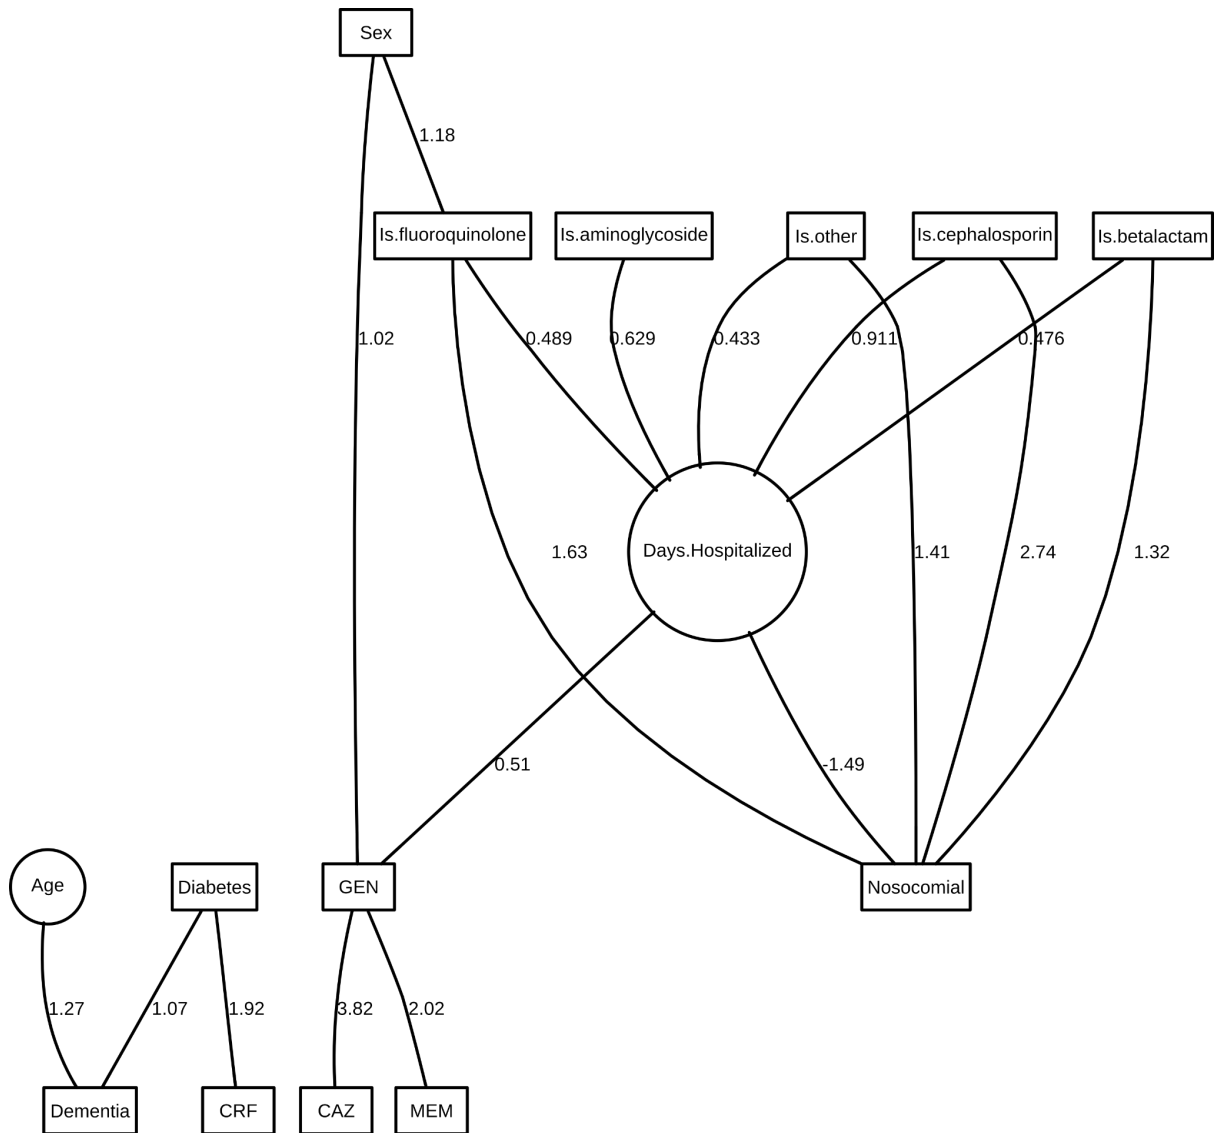

Figure S7: Final DAG for *P aeruginosa* in urine.

Table S9: *P aeruginosa* in urine parameter estimates and their 95% credible intervals. None of the non-intercept credible intervals contains zero.

| myvec                | Posterior statistics |        |        |       |
|----------------------|----------------------|--------|--------|-------|
|                      | 2.50%                | median | 97.50% | mode  |
| Age (Intercept)      | -0.07                | 0.00   | 0.07   | 0.00  |
| Age precision        | 0.90                 | 1.00   | 1.10   | 1.00  |
| Sex (Intercept)      | 0.00                 | 0.15   | 0.28   | 0.14  |
| Dementia (Intercept) | -3.65                | -3.16  | -2.76  | -3.14 |
| Dementia Age         | 0.82                 | 1.30   | 1.79   | 1.27  |
| Dementia Diabetes    | 0.46                 | 1.08   | 1.62   | 1.07  |
| Diabetes (Intercept) | -1.67                | -1.48  | -1.31  | -1.48 |



|                               |       |       |        |       |
|-------------------------------|-------|-------|--------|-------|
| Nosocomial Is.fluoroquinolone | 2.14  | 5.27  | 12.54  | 5.12  |
| Nosocomial Is.other           | 2.28  | 4.20  | 7.55   | 4.10  |
| Nosocomial Days.Hospitalized  | 0.17  | 0.22  | 0.29   | 0.23  |
| CAZ GEN                       | 22.13 | 46.39 | 103.41 | 45.41 |
| GEN Sex                       | 1.74  | 2.78  | 4.62   | 2.77  |
| GEN Days.Hospitalized         | 1.36  | 1.67  | 2.05   | 1.67  |
| MEM GEN                       | 3.28  | 7.67  | 16.78  | 7.54  |

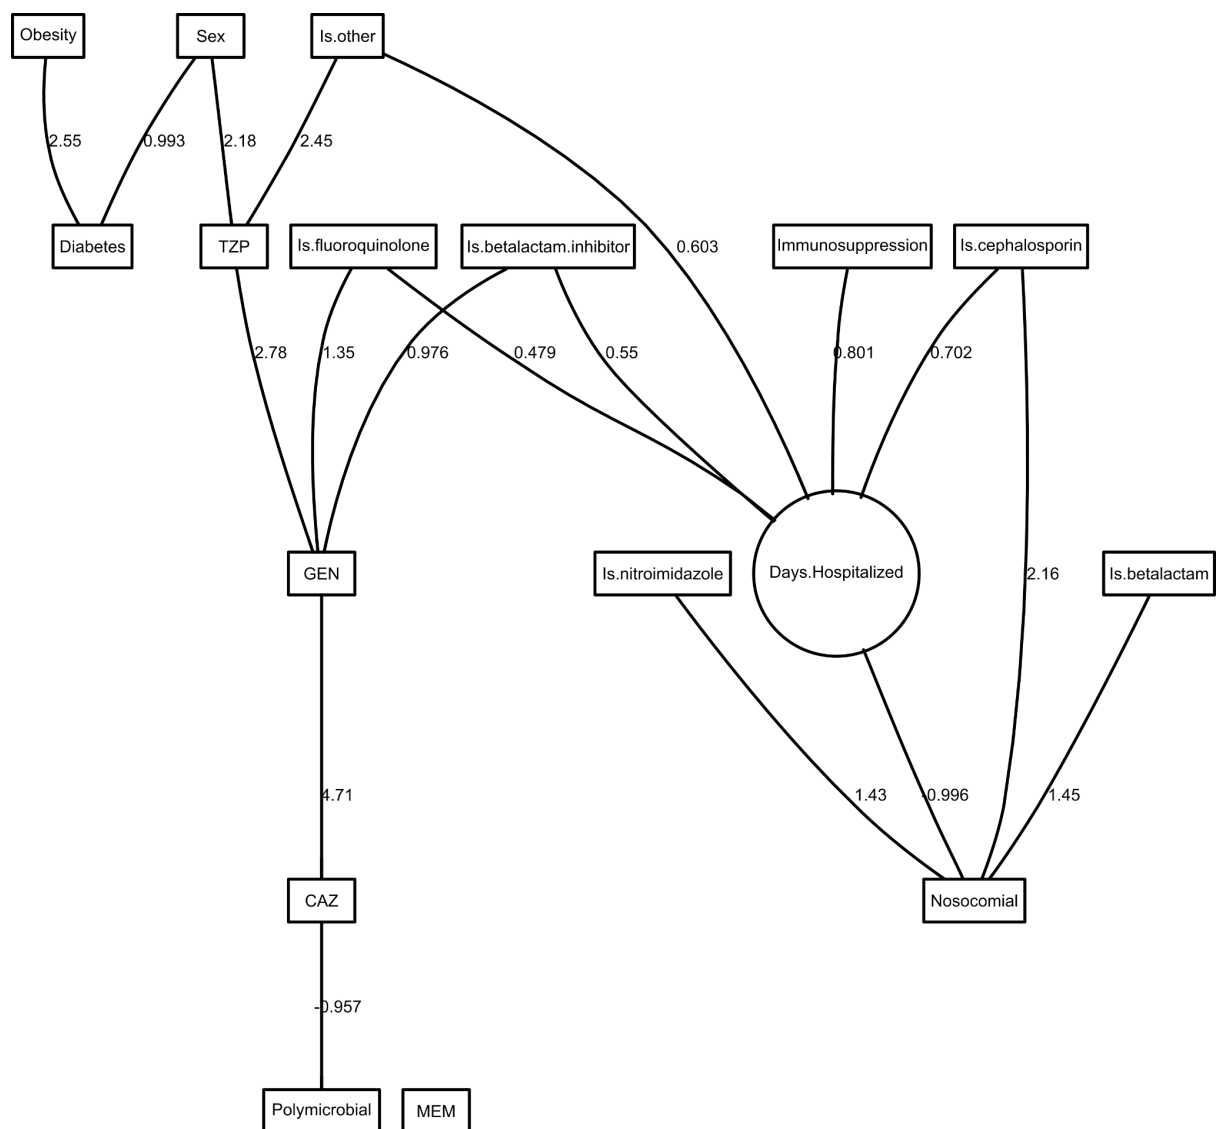

Figure S8: Final DAG for *P aeruginosa* in wound.

Table S10: *P aeruginosa* in wound parameter estimates and their 95% credible intervals. None of the non-intercept credible intervals contains zero.

| myvec                                     | Posterior statistics |        |        |       |
|-------------------------------------------|----------------------|--------|--------|-------|
|                                           | 2.50%                | median | 97.50% | mode  |
| Sex (Intercept)                           | 0.04                 | 0.22   | 0.38   | 0.21  |
| Immunosuppression (Intercept)             | -4.02                | -3.47  | -3.01  | -3.45 |
| Diabetes (Intercept)                      | -2.34                | -1.92  | -1.56  | -1.91 |
| Diabetes Sex                              | 0.54                 | 0.99   | 1.45   | 0.99  |
| Diabetes Obesity                          | 1.71                 | 2.58   | 3.52   | 2.55  |
| Obesity (Intercept)                       | -3.28                | -2.88  | -2.53  | -2.86 |
| Is.cephalosporin (Intercept)              | 0.48                 | 0.66   | 0.84   | 0.66  |
| Is.betalactam (Intercept)                 | -0.96                | -0.77  | -0.60  | -0.78 |
| Is.betalactam.inhibitor (Intercept)       | -1.27                | -1.07  | -0.88  | -1.07 |
| Is.nitroimidazole (Intercept)             | -1.71                | -1.48  | -1.27  | -1.48 |
| Is.fluoroquinolone (Intercept)            | -2.32                | -2.04  | -1.79  | -2.04 |
| Is.other (Intercept)                      | -1.96                | -1.72  | -1.49  | -1.71 |
| Days.Hospitalized (Intercept)             | -0.90                | -0.77  | -0.65  | -0.78 |
| Days.Hospitalized Immunosuppression       | 0.39                 | 0.79   | 1.20   | 0.80  |
| Days.Hospitalized Is.cephalosporin        | 0.55                 | 0.70   | 0.85   | 0.70  |
| Days.Hospitalized Is.betalactam.inhibitor | 0.39                 | 0.55   | 0.71   | 0.55  |
| Days.Hospitalized Is.fluoroquinolone      | 0.25                 | 0.47   | 0.70   | 0.48  |
| Days.Hospitalized Is.other                | 0.39                 | 0.60   | 0.80   | 0.60  |
| Days.Hospitalized precision               | 1.33                 | 1.52   | 1.70   | 1.53  |
| Nosocomial (Intercept)                    | -1.49                | -1.07  | -0.69  | -1.06 |
| Nosocomial Is.cephalosporin               | 1.63                 | 2.18   | 2.74   | 2.16  |
| Nosocomial Is.betalactam                  | 0.95                 | 1.48   | 2.01   | 1.45  |
| Nosocomial Is.nitroimidazole              | 0.72                 | 1.48   | 2.27   | 1.43  |
| Nosocomial Days.Hospitalized              | -1.31                | -1.00  | -0.74  | -1.00 |
| Polymicrobial (Intercept)                 | 0.48                 | 0.67   | 0.86   | 0.67  |
| Polymicrobial CAZ                         | -1.55                | -0.97  | -0.41  | -0.96 |
| CAZ (Intercept)                           | -5.68                | -4.58  | -3.78  | -4.51 |
| CAZ GEN                                   | 3.84                 | 4.79   | 5.92   | 4.71  |
| GEN (Intercept)                           | -2.70                | -2.32  | -2.00  | -2.32 |
| GEN Is.betalactam.inhibitor               | 0.44                 | 0.99   | 1.49   | 0.98  |
| GEN Is.fluoroquinolone                    | 0.70                 | 1.36   | 1.98   | 1.35  |
| GEN TZP                                   | 1.78                 | 2.86   | 4.03   | 2.78  |
| MEM (Intercept)                           | -3.80                | -3.30  | -2.88  | -3.29 |
| TZP (Intercept)                           | -8.01                | -5.95  | -4.56  | -5.71 |

|                              |       |        |        |        |
|------------------------------|-------|--------|--------|--------|
| TZP Sex                      | 0.92  | 2.31   | 4.28   | 2.18   |
| TZP Is.other                 | 1.52  | 2.48   | 3.45   | 2.45   |
|                              |       |        |        |        |
|                              | OR    |        |        |        |
|                              | 2.50% | median | 97.50% | mode   |
| Diabetes Sex                 | 1.71  | 2.70   | 4.27   | 2.70   |
| Diabetes Obesity             | 5.54  | 13.20  | 33.69  | 12.75  |
| Nosocomial Is.cephalosporin  | 5.12  | 8.88   | 15.41  | 8.71   |
| Nosocomial Is.betalactam     | 2.58  | 4.38   | 7.46   | 4.27   |
| Nosocomial Is.nitroimidazole | 2.06  | 4.40   | 9.72   | 4.20   |
| Nosocomial Days.Hospitalized | 0.27  | 0.37   | 0.48   | 0.37   |
| Polymicrobial CAZ            | 0.21  | 0.38   | 0.66   | 0.38   |
| CAZ GEN                      | 46.73 | 119.80 | 373.68 | 110.76 |
| GEN Is.betalactam.inhibitor  | 1.56  | 2.68   | 4.42   | 2.65   |
| GEN Is.fluoroquinolone       | 2.01  | 3.91   | 7.22   | 3.86   |
| GEN TZP                      | 5.92  | 17.41  | 56.00  | 16.13  |
| TZP Sex                      | 2.52  | 10.04  | 72.55  | 8.80   |
| TZP Is.other                 | 4.56  | 11.99  | 31.52  | 11.64  |



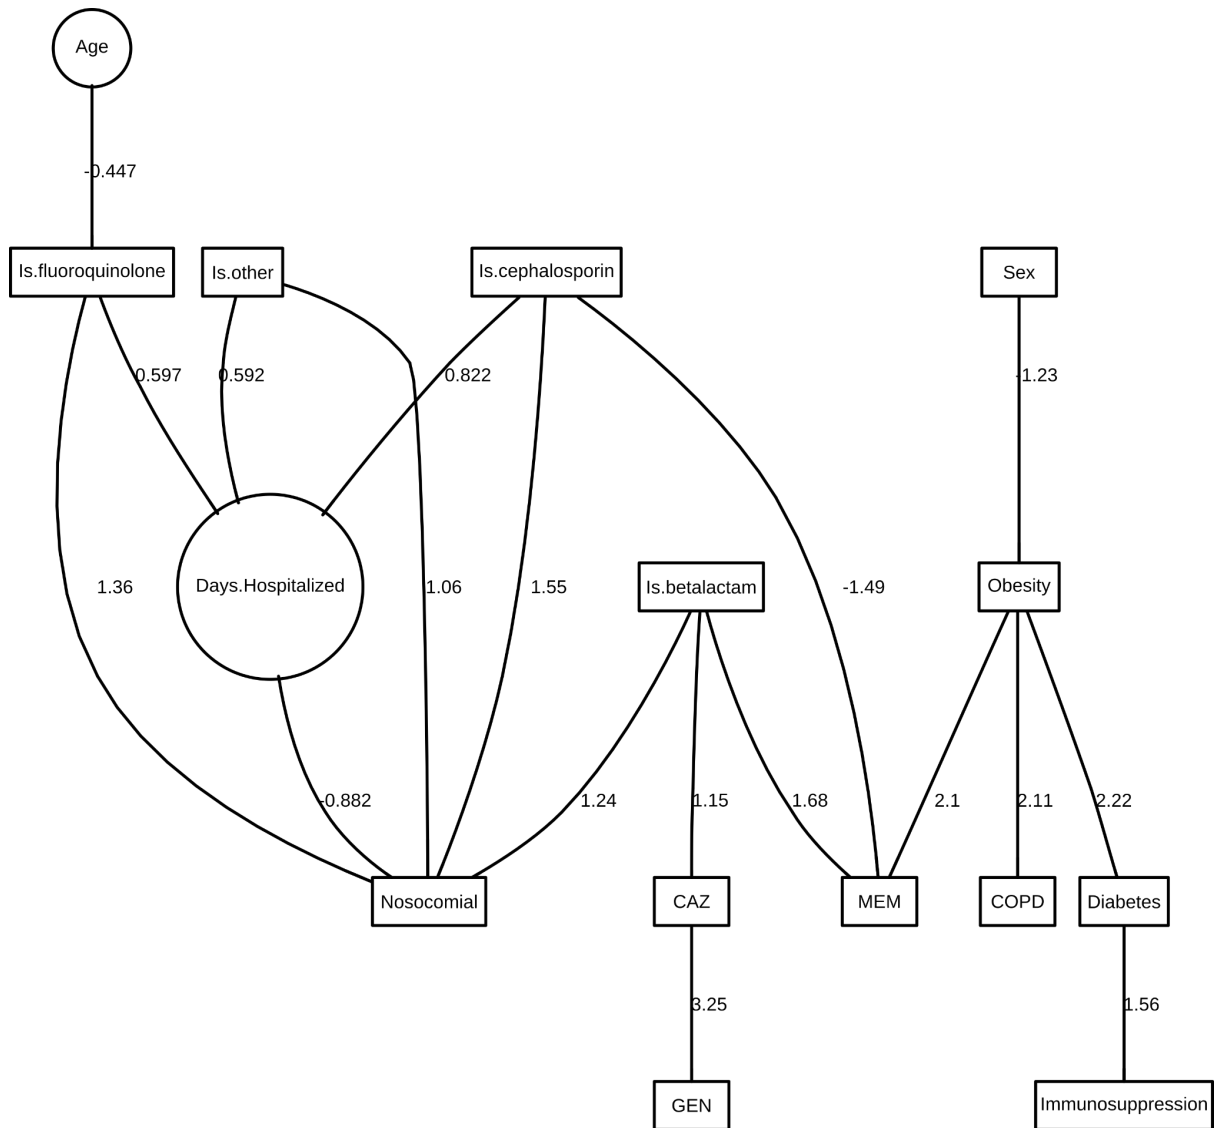

Figure S9: Final DAG for *P aeruginosa* in sputum.

Table S11: *P aeruginosa* in sputum parameter estimates and their 95% credible intervals. None of the non-intercept credible intervals contains zero.

| myvec                         | Posterior statistics |        |        |       |
|-------------------------------|----------------------|--------|--------|-------|
|                               | 2.50%                | median | 97.50% | mode  |
| Age (Intercept)               | -0.10                | 0.00   | 0.09   | 0.00  |
| Age precision                 | 0.87                 | 1.00   | 1.14   | 1.00  |
| Sex (Intercept)               | 0.42                 | 0.62   | 0.82   | 0.62  |
| Immunosuppression (Intercept) | -4.11                | -3.46  | -2.90  | -3.42 |
| Immunosuppression Diabetes    | 0.63                 | 1.57   | 2.44   | 1.56  |
| Diabetes (Intercept)          | -2.15                | -1.85  | -1.58  | -1.84 |
| Diabetes Obesity              | 1.41                 | 2.25   | 3.09   | 2.22  |

|                                      |       |        |        |       |
|--------------------------------------|-------|--------|--------|-------|
| COPD (Intercept)                     | -2.37 | -2.04  | -1.76  | -2.04 |
| COPD Obesity                         | 1.26  | 2.11   | 2.94   | 2.11  |
| Obesity (Intercept)                  | -2.70 | -2.13  | -1.65  | -2.12 |
| Obesity Sex                          | -2.11 | -1.24  | -0.44  | -1.23 |
| Is.cephalosporin (Intercept)         | 0.33  | 0.53   | 0.71   | 0.53  |
| Is.betalactam (Intercept)            | -0.91 | -0.70  | -0.51  | -0.70 |
| Is.fluoroquinolone (Intercept)       | -2.12 | -1.82  | -1.56  | -1.82 |
| Is.fluoroquinolone Age               | -0.69 | -0.45  | -0.21  | -0.45 |
| Is.other (Intercept)                 | -1.14 | -0.92  | -0.72  | -0.92 |
| Days.Hospitalized (Intercept)        | -0.91 | -0.77  | -0.65  | -0.77 |
| Days.Hospitalized Is.cephalosporin   | 0.66  | 0.82   | 0.98   | 0.82  |
| Days.Hospitalized Is.fluoroquinolone | 0.38  | 0.59   | 0.81   | 0.60  |
| Days.Hospitalized Is.other           | 0.42  | 0.59   | 0.76   | 0.59  |
| Days.Hospitalized precision          | 1.32  | 1.51   | 1.73   | 1.53  |
| Nosocomial (Intercept)               | -1.18 | -0.71  | -0.29  | -0.71 |
| Nosocomial Is.cephalosporin          | 1.01  | 1.57   | 2.16   | 1.55  |
| Nosocomial Is.betalactam             | 0.70  | 1.27   | 1.84   | 1.24  |
| Nosocomial Is.fluoroquinolone        | 0.59  | 1.42   | 2.27   | 1.36  |
| Nosocomial Is.other                  | 0.49  | 1.08   | 1.72   | 1.06  |
| Nosocomial Days.Hospitalized         | -1.23 | -0.89  | -0.60  | -0.88 |
| CAZ (Intercept)                      | -3.67 | -3.05  | -2.54  | -3.02 |
| CAZ Is.betalactam                    | 0.41  | 1.17   | 1.89   | 1.15  |
| GEN (Intercept)                      | -4.34 | -3.65  | -3.09  | -3.61 |
| GEN CAZ                              | 2.33  | 3.28   | 4.22   | 3.25  |
| MEM (Intercept)                      | -4.26 | -3.31  | -2.56  | -3.23 |
| MEM Obesity                          | 0.75  | 2.12   | 3.34   | 2.10  |
| MEM Is.cephalosporin                 | -2.55 | -1.54  | -0.60  | -1.49 |
| MEM Is.betalactam                    | 0.73  | 1.70   | 2.76   | 1.68  |
|                                      |       |        |        |       |
|                                      | OR    |        |        |       |
|                                      | 2.50% | median | 97.50% | mode  |
| Immunosuppression Diabetes           | 1.88  | 4.82   | 11.52  | 4.76  |
| Diabetes Obesity                     | 4.08  | 9.45   | 21.90  | 9.20  |
| COPD Obesity                         | 3.51  | 8.29   | 18.94  | 8.26  |
| Obesity Sex                          | 0.12  | 0.29   | 0.65   | 0.29  |
| Is.fluoroquinolone Age               | 0.50  | 0.64   | 0.81   | 0.64  |
| Nosocomial Is.cephalosporin          | 2.74  | 4.81   | 8.66   | 4.72  |

|                               |       |       |       |       |
|-------------------------------|-------|-------|-------|-------|
| Nosocomial Is.betalactam      | 2.01  | 3.56  | 6.30  | 3.46  |
| Nosocomial Is.fluoroquinolone | 1.80  | 4.12  | 9.73  | 3.91  |
| Nosocomial Is.other           | 1.62  | 2.93  | 5.56  | 2.89  |
| Nosocomial Days.Hospitalized  | 0.29  | 0.41  | 0.55  | 0.41  |
| CAZ Is.betalactam             | 1.51  | 3.21  | 6.64  | 3.16  |
| GEN CAZ                       | 10.31 | 26.52 | 68.21 | 25.87 |
| MEM Obesity                   | 2.12  | 8.30  | 28.09 | 8.16  |
| MEM Is.cephalosporin          | 0.08  | 0.21  | 0.55  | 0.23  |
| MEM Is.betalactam             | 2.07  | 5.48  | 15.77 | 5.34  |

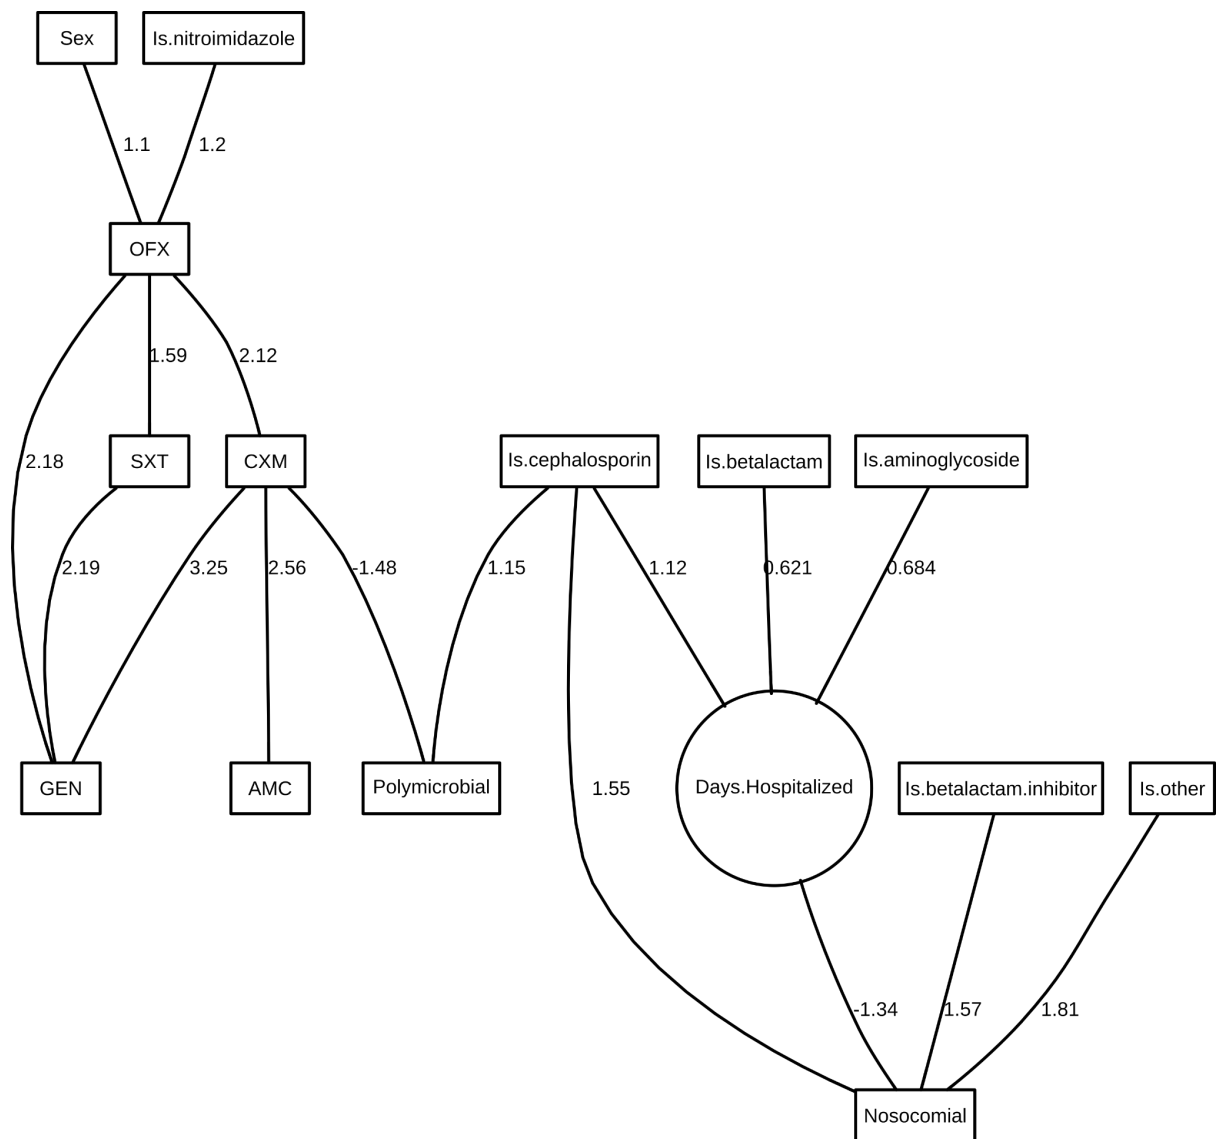

Figure S10: Final DAG for *P mirabilis* in urine.

Table S12: *P. mirabilis* in urine parameter estimates and their 95% credible intervals. None of the non-intercept credible intervals contains zero.

|                                     | Posterior statistics |        |        |       |
|-------------------------------------|----------------------|--------|--------|-------|
|                                     | 2.50%                | median | 97.50% | mode  |
| myvec                               |                      |        |        |       |
| Sex (Intercept)                     | -0.37                | -0.15  | 0.07   | -0.14 |
| Is.cephalosporin (Intercept)        | -0.77                | -0.53  | -0.31  | -0.53 |
| Is.betalactam (Intercept)           | -1.86                | -1.55  | -1.29  | -1.55 |
| Is.betalactam.inhibitor (Intercept) | -2.19                | -1.85  | -1.55  | -1.85 |
| Is.nitroimidazole (Intercept)       | -2.65                | -2.25  | -1.90  | -2.24 |
| Is.aminoglycoside (Intercept)       | -2.65                | -2.25  | -1.90  | -2.24 |
| Is.other (Intercept)                | -2.73                | -2.32  | -1.96  | -2.31 |
| Days.Hospitalized (Intercept)       | -0.69                | -0.59  | -0.49  | -0.59 |
| Days.Hospitalized Is.cephalosporin  | 0.94                 | 1.11   | 1.28   | 1.12  |
| Days.Hospitalized Is.betalactam     | 0.41                 | 0.62   | 0.83   | 0.62  |
| Days.Hospitalized Is.aminoglycoside | 0.41                 | 0.68   | 0.94   | 0.68  |
| Days.Hospitalized precision         | 1.83                 | 2.16   | 2.50   | 2.18  |
| Nosocomial (Intercept)              | -2.55                | -2.03  | -1.55  | -1.98 |
| Nosocomial Is.cephalosporin         | 0.81                 | 1.60   | 2.38   | 1.55  |
| Nosocomial Is.betalactam.inhibitor  | 0.68                 | 1.59   | 2.54   | 1.57  |
| Nosocomial Is.other                 | 0.85                 | 1.86   | 2.90   | 1.81  |
| Nosocomial Days.Hospitalized        | -1.94                | -1.37  | -0.90  | -1.34 |
| Polymicrobial (Intercept)           | -2.27                | -1.80  | -1.40  | -1.79 |
| Polymicrobial Is.cephalosporin      | 0.54                 | 1.17   | 1.76   | 1.15  |
| Polymicrobial CXM                   | -2.61                | -1.53  | -0.67  | -1.48 |
| AMC (Intercept)                     | -4.27                | -3.43  | -2.77  | -3.39 |
| AMC CXM                             | 1.75                 | 2.59   | 3.50   | 2.56  |
| CXM (Intercept)                     | -2.75                | -2.23  | -1.77  | -2.21 |
| CXM OFX                             | 1.56                 | 2.15   | 2.74   | 2.12  |
| GEN (Intercept)                     | -6.98                | -5.35  | -4.14  | -5.20 |
| GEN CXM                             | 2.48                 | 3.34   | 4.36   | 3.25  |
| GEN OFX                             | 1.31                 | 2.26   | 3.29   | 2.18  |
| GEN SXT                             | 1.37                 | 2.28   | 3.26   | 2.19  |
| OFX (Intercept)                     | -1.32                | -0.97  | -0.64  | -0.96 |
| OFX Sex                             | 0.63                 | 1.12   | 1.59   | 1.10  |
| OFX Is.nitroimidazole               | 0.39                 | 1.23   | 2.11   | 1.20  |
| SXT (Intercept)                     | -1.65                | -1.28  | -0.94  | -1.27 |

|                                    |       |        |        |       |
|------------------------------------|-------|--------|--------|-------|
| SXT OFX                            | 1.10  | 1.60   | 2.08   | 1.59  |
|                                    |       |        |        |       |
|                                    | OR    |        |        |       |
|                                    | 2.50% | median | 97.50% | mode  |
| Nosocomial Is.cephalosporin        | 2.26  | 4.95   | 10.85  | 4.73  |
| Nosocomial Is.betalactam.inhibitor | 1.98  | 4.93   | 12.72  | 4.81  |
| Nosocomial Is.other                | 2.33  | 6.39   | 18.24  | 6.14  |
| Nosocomial Days.Hospitalized       | 0.14  | 0.25   | 0.41   | 0.26  |
| Polymicrobial Is.cephalosporin     | 1.71  | 3.23   | 5.81   | 3.17  |
| Polymicrobial CXM                  | 0.07  | 0.22   | 0.51   | 0.23  |
| AMC CXM                            | 5.78  | 13.34  | 33.00  | 12.88 |
| CXM OFX                            | 4.74  | 8.55   | 15.43  | 8.35  |
| GEN CXM                            | 11.90 | 28.33  | 77.97  | 25.88 |
| GEN OFX                            | 3.70  | 9.57   | 26.79  | 8.84  |
| GEN SXT                            | 3.95  | 9.75   | 25.94  | 8.96  |
| OFX Sex                            | 1.88  | 3.06   | 4.89   | 3.01  |
| OFX Is.nitroimidazole              | 1.47  | 3.43   | 8.26   | 3.31  |
| SXT OFX                            | 3.00  | 4.95   | 8.01   | 4.90  |

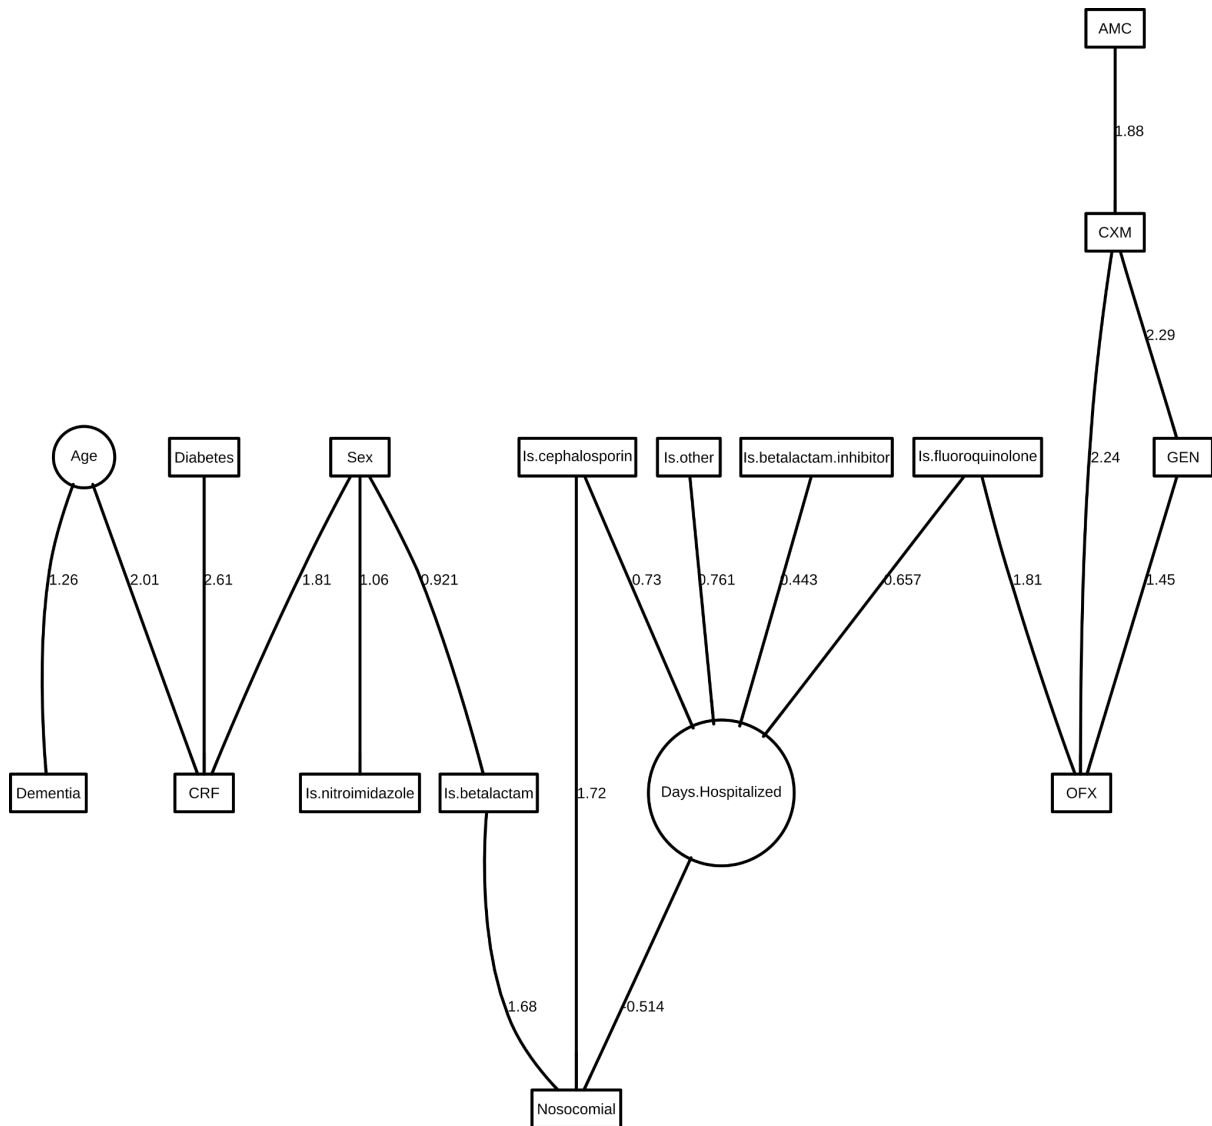

Figure S11: Final DAG for *P mirabilis* in wound.

Table S13: *P mirabilis* in wound parameter estimates and their 95% credible intervals. None of the non-intercept credible intervals contains zero.

|                      | Posterior statistics |        |        |       |
|----------------------|----------------------|--------|--------|-------|
|                      | 2.50%                | median | 97.50% | mode  |
| myvec                |                      |        |        |       |
| Age (Intercept)      | -0.12                | 0.00   | 0.11   | 0.00  |
| Age precision        | 0.85                 | 1.00   | 1.17   | 1.00  |
| Sex (Intercept)      | -0.21                | 0.02   | 0.24   | 0.02  |
| Dementia (Intercept) | -5.18                | -4.00  | -3.17  | -3.90 |
| Dementia Age         | 0.46                 | 1.31   | 2.27   | 1.26  |
| Diabetes (Intercept) | -1.28                | -1.01  | -0.77  | -1.01 |
| CRF (Intercept)      | -7.41                | -5.62  | -4.30  | -5.43 |



|                              |      |       |       |      |
|------------------------------|------|-------|-------|------|
| Is.betalactam Sex            | 1.57 | 2.51  | 4.01  | 2.51 |
| Is.nitroimidazole Sex        | 1.45 | 2.90  | 5.96  | 2.87 |
| Nosocomial Is.cephalosporin  | 3.11 | 5.71  | 10.74 | 5.57 |
| Nosocomial Is.betalactam     | 3.03 | 5.48  | 9.91  | 5.35 |
| Nosocomial Days.Hospitalized | 0.42 | 0.60  | 0.81  | 0.60 |
| CXM AMC                      | 3.03 | 6.68  | 14.30 | 6.58 |
| GEN CXM                      | 5.17 | 10.05 | 19.55 | 9.88 |
| OFX Is.fluoroquinolone       | 2.49 | 6.21  | 14.92 | 6.10 |
| OFX CXM                      | 4.71 | 9.84  | 19.97 | 9.43 |
| OFX GEN                      | 1.97 | 4.37  | 9.43  | 4.26 |

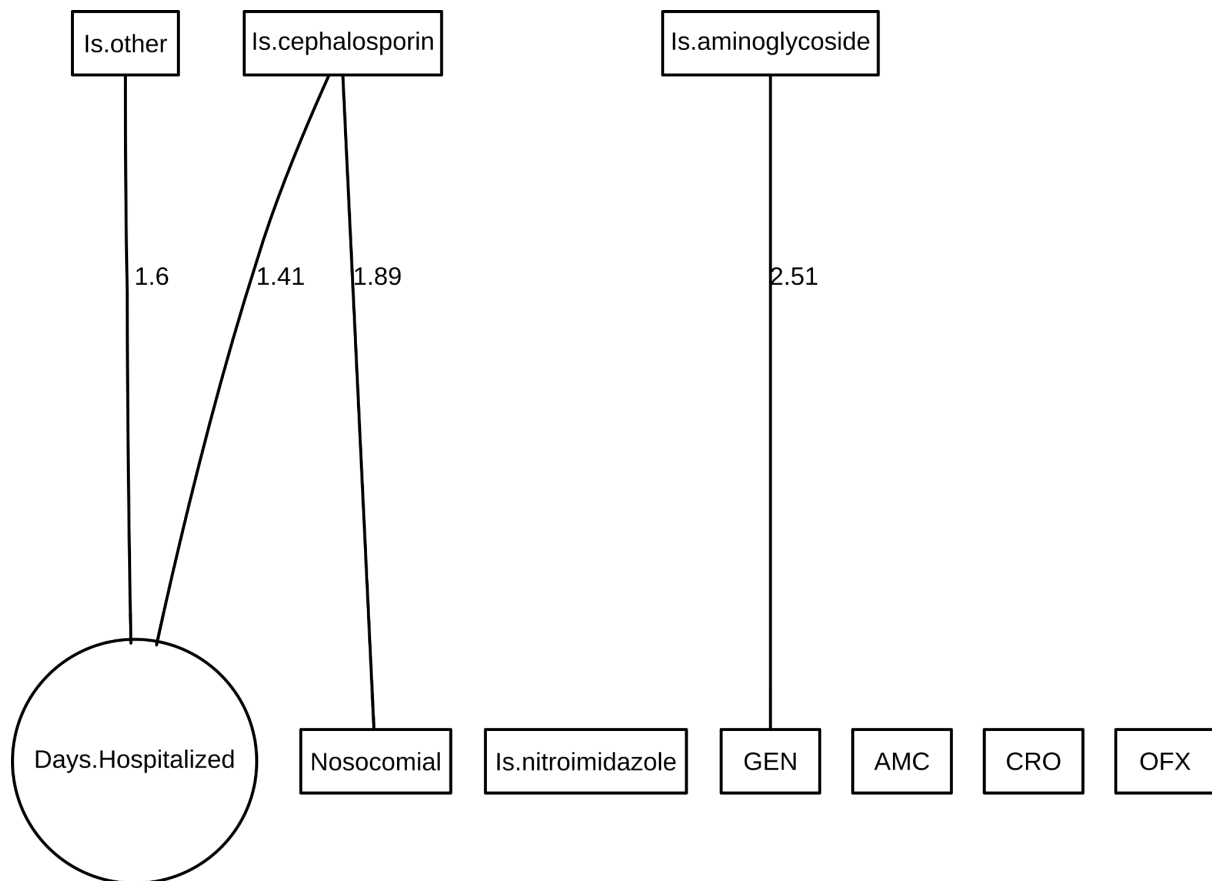

Figure S12: Final DAG for *P mirabilis* in aerobic blood.

Table S14: *P mirabilis* in aerobic blood parameter estimates and their 95% credible intervals. None of the non-intercept credible intervals contains zero.



|                                    | Posterior statistics |        |        |       |
|------------------------------------|----------------------|--------|--------|-------|
| myvec                              | 2.50%                | median | 97.50% | mode  |
| Is.cephalosporin (Intercept)       | -0.84                | -0.25  | 0.31   | -0.24 |
| Is.nitroimidazole (Intercept)      | -3.06                | -2.04  | -1.27  | -1.99 |
| Is.aminoglycoside (Intercept)      | -3.38                | -2.25  | -1.40  | -2.20 |
| Is.other (Intercept)               | -4.36                | -2.86  | -1.81  | -2.75 |
| Days.Hospitalized (Intercept)      | -0.97                | -0.71  | -0.47  | -0.72 |
| Days.Hospitalized Is.cephalosporin | 1.04                 | 1.40   | 1.76   | 1.41  |
| Days.Hospitalized Is.other         | 0.82                 | 1.59   | 2.36   | 1.60  |
| Days.Hospitalized precision        | 1.64                 | 2.59   | 3.74   | 2.67  |
| Nosocomial (Intercept)             | -2.72                | -1.59  | -0.68  | -1.53 |
| Nosocomial Is.cephalosporin        | 0.65                 | 2.00   | 3.39   | 1.89  |
| AMC (Intercept)                    | -2.80                | -1.84  | -1.11  | -1.81 |
| CRO (Intercept)                    | -1.77                | -1.06  | -0.45  | -1.05 |
| GEN (Intercept)                    | -1.91                | -1.14  | -0.49  | -1.13 |
| GEN Is.aminoglycoside              | 0.52                 | 2.81   | 6.19   | 2.51  |
| OFX (Intercept)                    | -2.38                | -1.54  | -0.85  | -1.52 |
|                                    |                      |        |        |       |
|                                    | OR                   |        |        |       |
|                                    | 2.50%                | median | 97.50% | mode  |
| Nosocomial Is.cephalosporin        | 1.92                 | 7.36   | 29.65  | 6.64  |
| GEN Is.aminoglycoside              | 1.69                 | 16.66  | 489.93 | 12.32 |

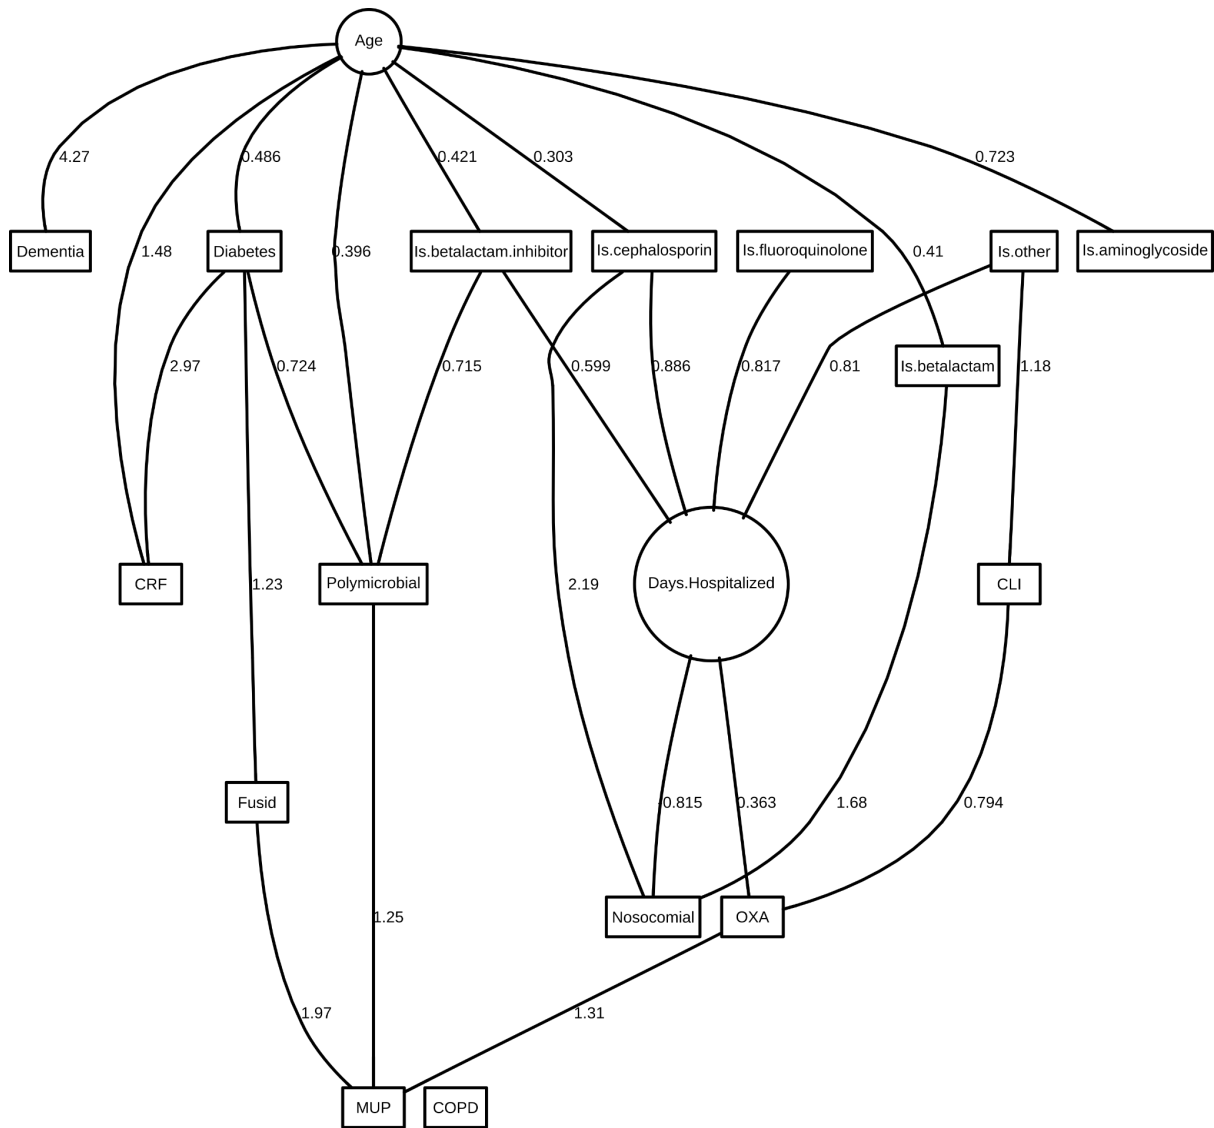

Figure S13: Final DAG for *S. aureus* in wound.

Table S15: *S. aureus* in wound parameter estimates and their 95% credible intervals. None of the non-intercept credible intervals contains zero.

|                      | Posterior statistics |        |        |       |
|----------------------|----------------------|--------|--------|-------|
|                      | 2.50%                | median | 97.50% | mode  |
| myvec                |                      |        |        |       |
| Age (Intercept)      | -0.08                | 0.00   | 0.07   | 0.00  |
| Age precision        | 0.90                 | 1.00   | 1.11   | 1.00  |
| Dementia (Intercept) | -13.95               | -9.26  | -6.31  | -8.86 |
| Dementia Age         | 2.28                 | 4.55   | 7.59   | 4.27  |
| Diabetes (Intercept) | -1.83                | -1.62  | -1.42  | -1.61 |
| Diabetes Age         | 0.27                 | 0.49   | 0.71   | 0.49  |
| COPD (Intercept)     | -4.18                | -3.66  | -3.24  | -3.65 |

|                                           |       |       |       |       |
|-------------------------------------------|-------|-------|-------|-------|
| CRF (Intercept)                           | -6.30 | -5.18 | -4.33 | -5.09 |
| CRF Age                                   | 0.84  | 1.52  | 2.26  | 1.48  |
| CRF Diabetes                              | 2.17  | 3.03  | 3.96  | 2.97  |
| Is.cephalosporin (Intercept)              | -0.46 | -0.31 | -0.16 | -0.31 |
| Is.cephalosporin Age                      | 0.14  | 0.31  | 0.46  | 0.30  |
| Is.betalactam (Intercept)                 | -1.34 | -1.16 | -0.99 | -1.15 |
| Is.betalactam Age                         | 0.22  | 0.42  | 0.60  | 0.41  |
| Is.betalactam.inhibitor (Intercept)       | -1.40 | -1.22 | -1.05 | -1.22 |
| Is.betalactam.inhibitor Age               | 0.23  | 0.42  | 0.62  | 0.42  |
| Is.aminoglycoside (Intercept)             | -3.98 | -3.45 | -3.03 | -3.42 |
| Is.aminoglycoside Age                     | 0.27  | 0.74  | 1.24  | 0.72  |
| Is.fluoroquinolone (Intercept)            | -2.89 | -2.58 | -2.32 | -2.58 |
| Is.other (Intercept)                      | -2.51 | -2.25 | -2.01 | -2.24 |
| Days.Hospitalized (Intercept)             | -0.73 | -0.65 | -0.58 | -0.65 |
| Days.Hospitalized Is.cephalosporin        | 0.78  | 0.88  | 0.99  | 0.89  |
| Days.Hospitalized Is.betalactam.inhibitor | 0.48  | 0.60  | 0.72  | 0.60  |
| Days.Hospitalized Is.fluoroquinolone      | 0.60  | 0.81  | 1.02  | 0.82  |
| Days.Hospitalized Is.other                | 0.63  | 0.81  | 0.98  | 0.81  |
| Days.Hospitalized precision               | 1.88  | 2.09  | 2.31  | 2.10  |
| Nosocomial (Intercept)                    | -1.83 | -1.54 | -1.27 | -1.53 |
| Nosocomial Is.cephalosporin               | 1.76  | 2.20  | 2.65  | 2.19  |
| Nosocomial Is.betalactam                  | 1.25  | 1.69  | 2.12  | 1.68  |
| Nosocomial Days.Hospitalized              | -1.07 | -0.82 | -0.59 | -0.82 |
| Polymicrobial (Intercept)                 | -0.90 | -0.71 | -0.52 | -0.70 |
| Polymicrobial Age                         | 0.22  | 0.40  | 0.57  | 0.40  |
| Polymicrobial Diabetes                    | 0.29  | 0.73  | 1.14  | 0.72  |
| Polymicrobial Is.betalactam.inhibitor     | 0.34  | 0.72  | 1.09  | 0.71  |
| CLI (Intercept)                           | -1.02 | -0.85 | -0.68 | -0.85 |
| CLI Is.other                              | 0.68  | 1.18  | 1.70  | 1.18  |
| Fusid (Intercept)                         | -3.99 | -3.47 | -3.03 | -3.45 |
| Fusid Diabetes                            | 0.44  | 1.21  | 1.96  | 1.23  |
| MUP (Intercept)                           | -5.07 | -4.26 | -3.60 | -4.22 |
| MUP Polymicrobial                         | 0.57  | 1.27  | 1.99  | 1.25  |
| MUP Fusid                                 | 0.98  | 1.97  | 2.87  | 1.97  |
| MUP OXA                                   | 0.64  | 1.33  | 2.00  | 1.31  |
| OXA (Intercept)                           | -1.51 | -1.29 | -1.08 | -1.28 |
| OXA Days.Hospitalized                     | 0.20  | 0.37  | 0.52  | 0.36  |

|                                       |       |        |          |       |
|---------------------------------------|-------|--------|----------|-------|
| OXA CLI                               | 0.44  | 0.80   | 1.13     | 0.79  |
|                                       |       |        |          |       |
|                                       | OR    |        |          |       |
|                                       | 2.50% | median | 97.50%   | mode  |
| Dementia Age                          | 9.75  | 95.00  | 1,977.97 | 71.47 |
| Diabetes Age                          | 1.31  | 1.63   | 2.03     | 1.63  |
| CRF Age                               | 2.31  | 4.56   | 9.55     | 4.39  |
| CRF Diabetes                          | 8.77  | 20.75  | 52.60    | 19.40 |
| Is.cephalosporin Age                  | 1.16  | 1.36   | 1.58     | 1.35  |
| Is.betalactam Age                     | 1.25  | 1.52   | 1.83     | 1.51  |
| Is.betalactam.inhibitor Age           | 1.26  | 1.53   | 1.85     | 1.52  |
| Is.aminoglycoside Age                 | 1.31  | 2.10   | 3.44     | 2.06  |
| Nosocomial Is.cephalosporin           | 5.81  | 9.05   | 14.09    | 8.95  |
| Nosocomial Is.betalactam              | 3.49  | 5.44   | 8.34     | 5.36  |
| Nosocomial Days.Hospitalized          | 0.34  | 0.44   | 0.55     | 0.44  |
| Polymicrobial Age                     | 1.25  | 1.50   | 1.76     | 1.49  |
| Polymicrobial Diabetes                | 1.34  | 2.08   | 3.11     | 2.06  |
| Polymicrobial Is.betalactam.inhibitor | 1.41  | 2.06   | 2.97     | 2.04  |
| CLI Is.other                          | 1.97  | 3.25   | 5.48     | 3.26  |
| Fusid Diabetes                        | 1.55  | 3.36   | 7.08     | 3.41  |
| MUP Polymicrobial                     | 1.77  | 3.55   | 7.33     | 3.48  |
| MUP Fusid                             | 2.67  | 7.15   | 17.73    | 7.18  |
| MUP OXA                               | 1.89  | 3.79   | 7.37     | 3.70  |
| OXA Days.Hospitalized                 | 1.22  | 1.44   | 1.68     | 1.44  |
| OXA CLI                               | 1.55  | 2.23   | 3.11     | 2.21  |

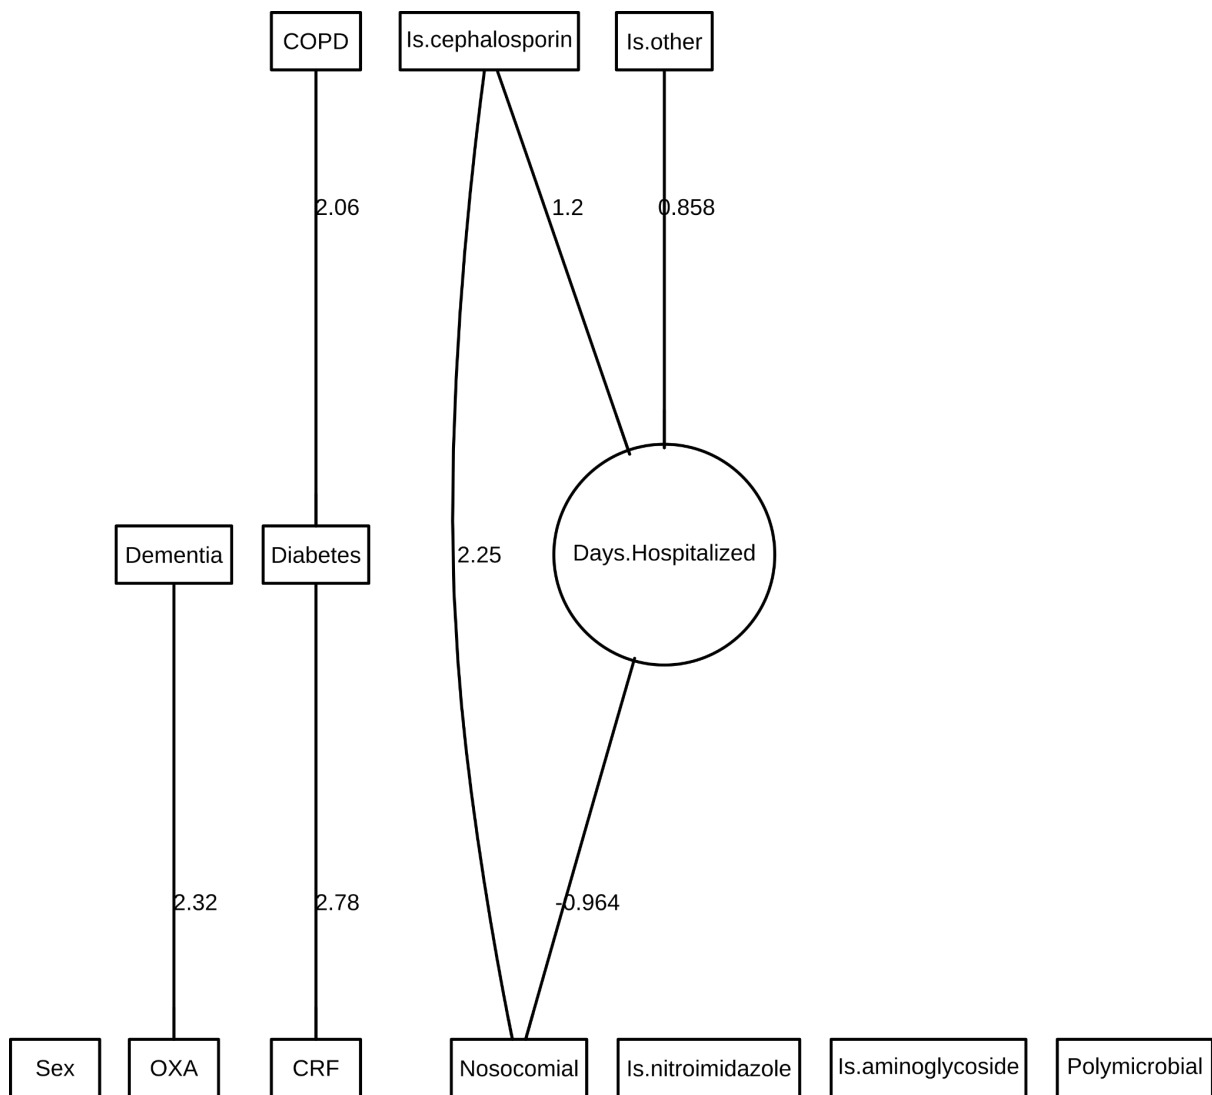

Figure S14: Final DAG for *S aureus* in aerobic blood.

Table S16: *S aureus* in aerobic blood parameter estimates and their 95% credible intervals. None of the non-intercept credible intervals contains zero.

|                              | Posterior statistics |        |        |       |
|------------------------------|----------------------|--------|--------|-------|
|                              | 2.50%                | median | 97.50% | mode  |
| myvec                        |                      |        |        |       |
| Sex (Intercept)              | 0.09                 | 0.43   | 0.76   | 0.42  |
| Dementia (Intercept)         | -3.99                | -3.09  | -2.41  | -3.04 |
| Diabetes (Intercept)         | -2.44                | -1.90  | -1.44  | -1.88 |
| Diabetes COPD                | 0.73                 | 2.08   | 3.43   | 2.06  |
| COPD (Intercept)             | -3.31                | -2.60  | -2.02  | -2.56 |
| CRF (Intercept)              | -4.08                | -3.06  | -2.33  | -3.02 |
| CRF Diabetes                 | 1.65                 | 2.85   | 4.04   | 2.78  |
| Is.cephalosporin (Intercept) | -1.06                | -0.70  | -0.38  | -0.70 |

|                                    |       |        |        |       |
|------------------------------------|-------|--------|--------|-------|
| Is.nitroimidazole (Intercept)      | -3.06 | -2.40  | -1.86  | -2.38 |
| Is.aminoglycoside (Intercept)      | -3.44 | -2.70  | -2.10  | -2.67 |
| Is.other (Intercept)               | -3.06 | -2.40  | -1.86  | -2.38 |
| Days.Hospitalized (Intercept)      | -0.62 | -0.47  | -0.33  | -0.47 |
| Days.Hospitalized Is.cephalosporin | 0.93  | 1.19   | 1.46   | 1.20  |
| Days.Hospitalized Is.other         | 0.39  | 0.85   | 1.31   | 0.86  |
| Days.Hospitalized precision        | 1.46  | 1.88   | 2.32   | 1.89  |
| Nosocomial (Intercept)             | -1.83 | -1.27  | -0.76  | -1.23 |
| Nosocomial Is.cephalosporin        | 1.23  | 2.32   | 3.56   | 2.25  |
| Nosocomial Days.Hospitalized       | -1.66 | -1.00  | -0.49  | -0.96 |
| Polymicrobial (Intercept)          | -3.31 | -2.60  | -2.02  | -2.56 |
| OXA (Intercept)                    | -1.86 | -1.41  | -1.02  | -1.40 |
| OXA Dementia                       | 0.73  | 2.45   | 4.55   | 2.32  |
|                                    |       |        |        |       |
|                                    | OR    |        |        |       |
|                                    | 2.50% | median | 97.50% | mode  |
| Diabetes COPD                      | 2.08  | 8.02   | 30.96  | 7.82  |
| CRF Diabetes                       | 5.22  | 17.20  | 56.69  | 16.08 |
| Nosocomial Is.cephalosporin        | 3.41  | 10.20  | 35.24  | 9.47  |
| Nosocomial Days.Hospitalized       | 0.19  | 0.37   | 0.61   | 0.38  |
| OXA Dementia                       | 2.07  | 11.60  | 94.55  | 10.15 |

Table S17: Median difference and confidence intervals between parameter estimates (ln(OR)) obtained from models of bacterial species cultured from different sources.

|                      |                 | Confidence interval of difference |      |        |    |
|----------------------|-----------------|-----------------------------------|------|--------|----|
|                      |                 | 2.50%                             | 50%  | 97.50% |    |
| <b><i>E coli</i></b> |                 |                                   |      |        |    |
| CAZ,GEN              |                 |                                   |      |        |    |
|                      | Urine - Wound   | -0.16                             | 0.06 | 0.27   | NS |
| CAZ,OFX              |                 |                                   |      |        |    |
|                      | Aerobic - Urine | -0.25                             | 0.09 | 0.44   | NS |
|                      | Aerobic - Wound | 0.87                              | 1.00 | 1.15   |    |
|                      | Urine - Wound   | 0.71                              | 0.92 | 1.12   |    |
| GEN,OFX              |                 |                                   |      |        |    |

|                                                                                                                                                                                                                                                                  |                 |       |       |       |     |
|------------------------------------------------------------------------------------------------------------------------------------------------------------------------------------------------------------------------------------------------------------------|-----------------|-------|-------|-------|-----|
|                                                                                                                                                                                                                                                                  | Aerobic - Urine | 0.86  | 1.33  | 1.87  |     |
|                                                                                                                                                                                                                                                                  | Aerobic - Wound | 0.70  | 0.97  | 1.31  |     |
|                                                                                                                                                                                                                                                                  | Urine - Wound   | -0.56 | -0.36 | -0.15 |     |
| <b><i>K pneumoniae</i></b>                                                                                                                                                                                                                                       |                 |       |       |       |     |
| GEN, OFX                                                                                                                                                                                                                                                         |                 |       |       |       |     |
|                                                                                                                                                                                                                                                                  | Aerobic - Urine | 0.95  | 2.05  | 3.66  |     |
|                                                                                                                                                                                                                                                                  | Aerobic - Wound | 0.58  | 1.24  | 2.34  |     |
|                                                                                                                                                                                                                                                                  | Urine - Wound   | -1.33 | -0.81 | -0.37 |     |
| OFX, TZP                                                                                                                                                                                                                                                         |                 |       |       |       |     |
|                                                                                                                                                                                                                                                                  | Urine - Wound   | -1.46 | -0.78 | -0.27 |     |
| <b><i>P aeruginosa</i></b>                                                                                                                                                                                                                                       |                 |       |       |       |     |
| CAZ, GEN                                                                                                                                                                                                                                                         |                 |       |       |       |     |
|                                                                                                                                                                                                                                                                  | Urine - Sputum  | 0.42  | 0.57  | 0.76  |     |
|                                                                                                                                                                                                                                                                  | Wound - Sputum  | 1.48  | 1.50  | 1.68  |     |
|                                                                                                                                                                                                                                                                  | Urine - Wound   | -1.25 | -0.93 | -0.74 |     |
| <b><i>P Mirabilis</i></b>                                                                                                                                                                                                                                        |                 |       |       |       |     |
| Urine - Wound                                                                                                                                                                                                                                                    |                 |       |       |       |     |
|                                                                                                                                                                                                                                                                  | AMC, CXM        | 0.63  | 0.70  | 0.84  |     |
|                                                                                                                                                                                                                                                                  | CXM, GEN        | 0.83  | 1.04  | 1.37  |     |
|                                                                                                                                                                                                                                                                  | CXM, OFX        | -0.26 | -0.14 | -0.01 | NS* |
|                                                                                                                                                                                                                                                                  | GEN, OFX        | 0.64  | 0.78  | 1.06  |     |
| <p>Note: AMC, amoxicillin/clavulanate; CAZ, ceftazidime; CXM, cefuroxime; GEN, gentamicin; OFX, ofloxacin; TZP, piperacillin/tazobactam. NS denotes no significant difference in parameter estimate between bacterial sources. *Effectively not significant.</p> |                 |       |       |       |     |
